# Supplementary material
Source: PubMed Central journal article supplement (PMC4359925)
Supplement: supp_128.6.1217_JCS165746.pdf [file supp_128.6.1217_JCS165746.pdf]

## Supplementary Materials

### Supplementary Figure S1

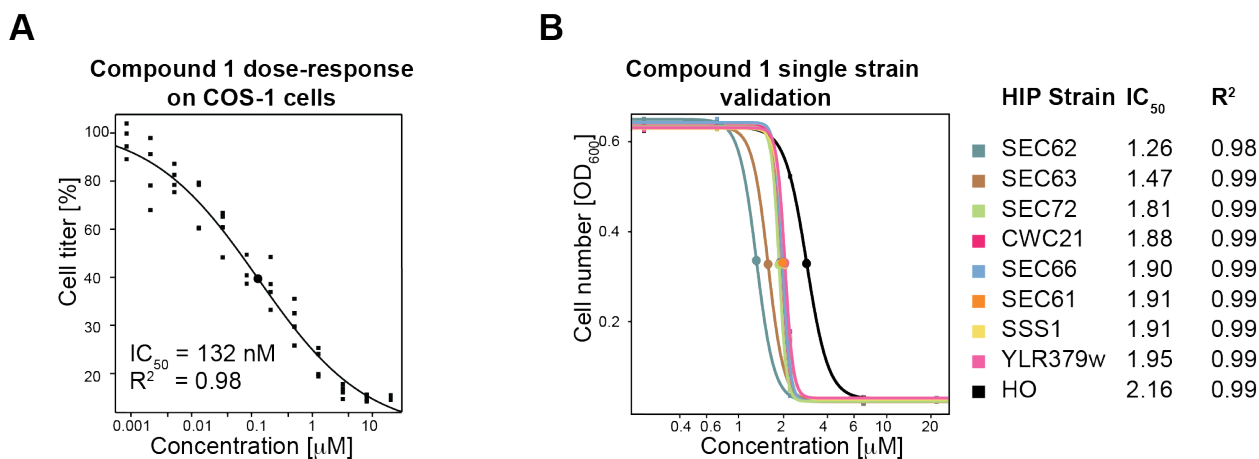

**Figure S1. Validation of individual HIP strains identified to be hypersensitive to compound 1.**

Dose response curves and  $\text{IC}_{50}$  values confirm hypersensitivity to compound 1 of diploid strains specifically haploid for translocon components compared to HO control strain in the same order as observed in the HIP profile shown in Fig. 2.  $r^2$  values reflect the quality of the fit to a sigmoid curve function.

## Supplementary Figure S2

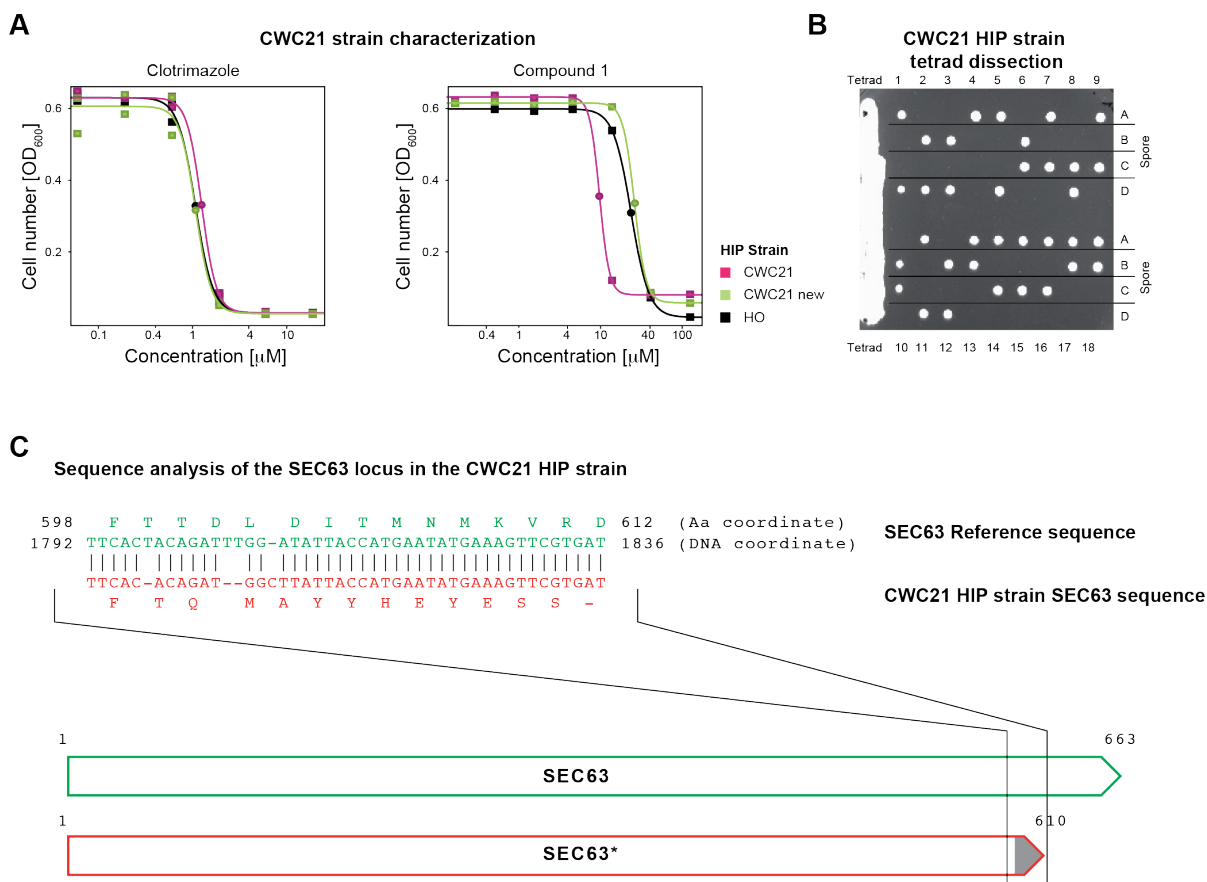

**Figure S2. The *CWC21* gene is not linked to translocon function, but the *CWC21* HIP strain in the deletion collection carries a background mutation in the *SEC63* gene.**

(A) The *CWC21* HIP strain from the yeast deletion collection, but not a freshly generated *CWC21* HIP strain, is hypersensitive to compound 1 targeting the *SEC61* translocon, but not against the Erg11 inhibitor clotrimazole, an example of an unrelated inhibitor. (B) Sporulation and tetrad dissection of the *CWC21* HIP strain yielded only 2 viable spores, even though *CWC21* is a nonessential gene. (Further analysis revealed that viability is not linked to the *cwc21::KanMX* marker, data not shown). (C) Sequencing the *SEC61*, *SEC62*, and *SEC63* genes in the *CWC21* HIP strain revealed heterozygous mutations in the C-terminal part of *SEC63*, leading to amino acid changes and protein truncation.

## Supplementary Figure S3

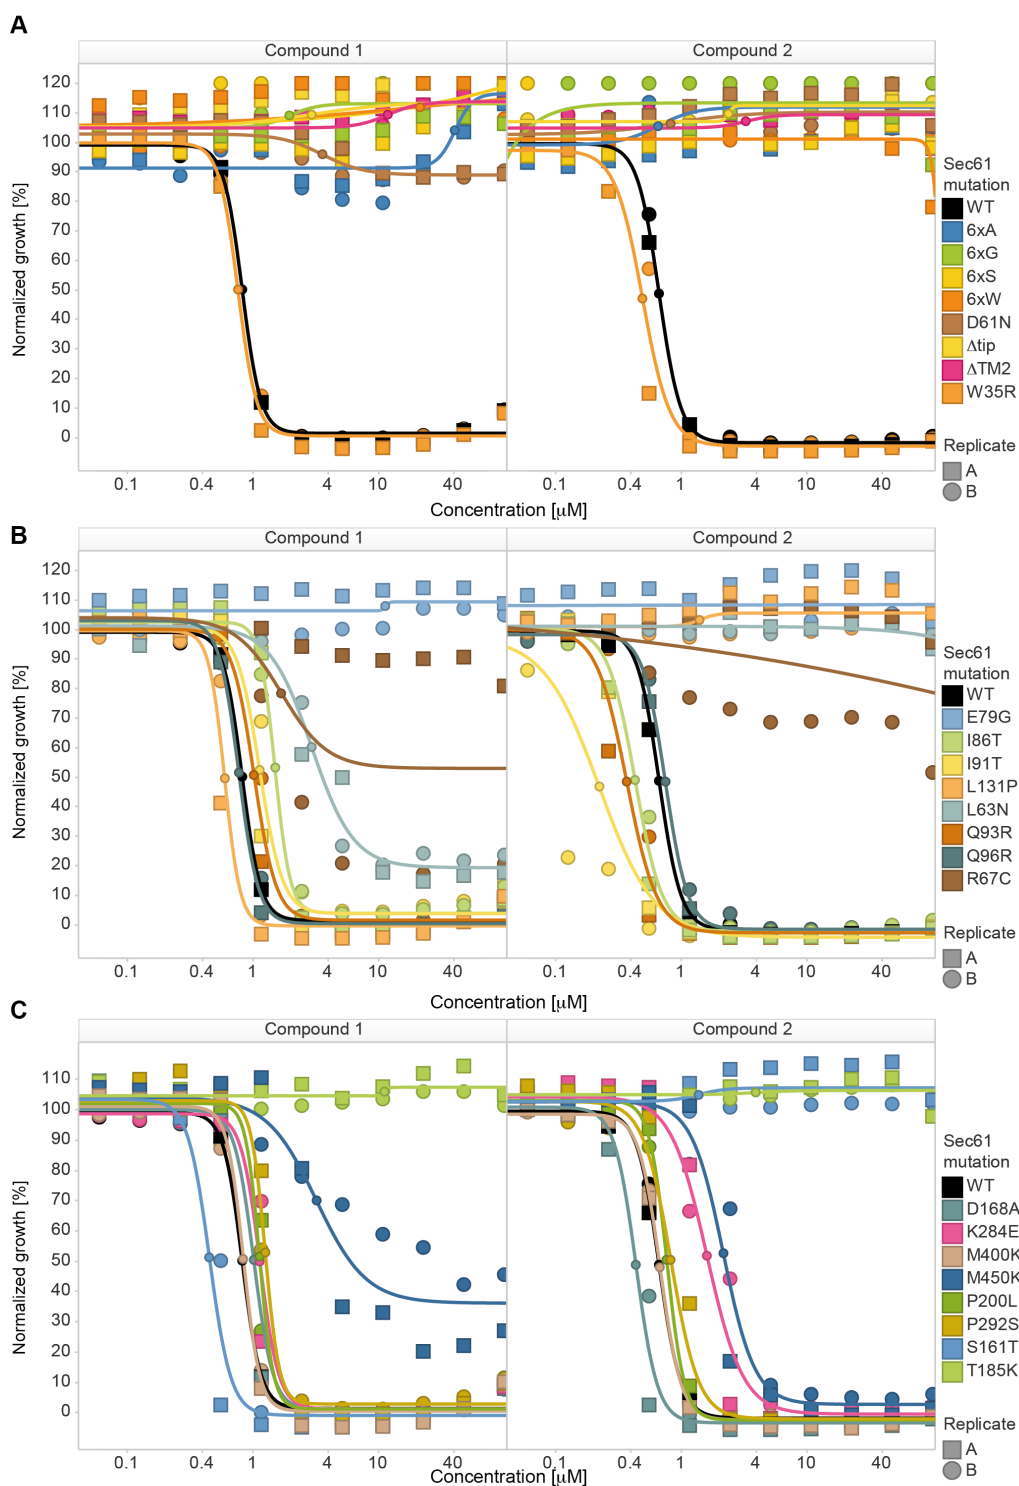

**Figure S3. Sensitivity of previously described Sec61p mutants to compounds 1 and 2.** Dose-response curves of yeast strains expressing the indicated Sec61p point mutants described previously (Junne *et al.*,

2006; Junne *et al.*, 2007), for compounds 1 and 2. Each panel shows Sec61p wild-type and eight mutants tested against each compound. Replicate analyses are distinguished by squares and circles. Resulting IC<sub>50</sub> and r<sup>2</sup> values are listed in Table 2.

**Table S1. DNA and Protein sequences of genes depicted in Fig. 1C**

Orf2 : L-pipecolate oxidase  
 Orf3 : NRPS  
 Orf4 : 2-hydroxyacid dehydrogenase  
 Orf5 : 2-isopropylmalate synthase

>Orf2\_nt

```
ATGGCCAATTCTCCTCACTCCTATATTATAGTTGGGGCCGGCGTCTTTGGCGCTTCCACGGCCCTCCATCTTATCCA
AGAACATCCTCAGGCATCCATCATTCTGCTTGACCGCGATAGCTACACTGCCCAATTTCGTGTGGCGGCGTCATGGG
ATTGGAACAAAGTCATTCGTGCCGACTACATTGACCCCTCTATATGAAACTCGCCGTCGAAGCCCAAGAGTGTGG
CGCACCAAGCCATTGTGGAAGCCATTCTATCATGAGAGGGGAAGGTTATGTGTTATGGCTGGTGATGGGGCGCAGCG
TGTGCGCCGCAACTATGATGATATAGCGGTCGATATGGGAGTGAGTGTCTTGAATGTGGAGGATGCGAAAACCCGAT
ACAACGGTGCATTTAAAGATGCTGTATACGACGGAGTAACAGAGGTGCTAGTAAACGAAAGGGGCGGCTGGGCAGAA
GCGAAGGAAGCACTCAGAAGCGGCATCGAAAGTGCGGTGCGACCTTGGGGTGAAATACGTCGTAGCTGAGATCAGGGA
GCTGCTATTAGGCACAGAAGGGGCATGTGTAGGAGTTCGGACTAGTATGGGTGAGGAGTTGAAGGCAGACCCGATCA
TACTCTGCACAGGCCCTACACGCCCAAATTGTTACTTGGATAGTGATCCTGCTTGGACAGAGCTACATGCGGGAGAG
CGGATTTTCGCGCCGCGCAGTGGCGGAAGGGTTGGCTCGCATGAAAGATGACGAGGTGTGGCTTTGTTCATGGTCCAGT
TGGGAGTTCGGATGTGCCAGCAAGCCGCCAGGCGCATCCGCGGGAAGCACTGTGGGAAGCGTTCCGCATTTCCAAGG
ATAAGTTCCTTGAAGTTCGGGGGGCAAAGTCATTGGCAATATGGTCGAGGACCTTGCAACTGGGATCCGATTTTCA
ACGCCCTCCTTCCAAGCCTGACTACGATCAATTGAATGTACCGCAGTCTTTGAAGGACGACGTTTCATCAGCCGGAGA
GTACCTTTTCGGGGAGAGAGGTGCGGCCTTTTCATGTTGAAAACATAGATTATGCTGGGAAGCGGTGACGCCTAGCG
ATGACTTTTATTATCTCGCCTCATCCAGCAAGTAAAGGACTCTACATAGCAACATGTGGCTCCTTTTCATAGCTGGAAG
TTCTTACCCGTGATTGGGAAATATGTGTTACAAATGTTGGAGGGCCAAC TAGAAGAATCTGTTGCATCTAAGTGGGC
TTGGGATCGGAAACGTCCTAGTCCTCAGTCTAGTCGAAACTGGCCCAAGTTTGAGCTCAAAGATCTCTAA
```

>Orf2\_translation

```
MANSPHSYIIIVGAGVFGASTALHLIQEHPOQASIIILLDRDSYTAPIRVAASWDWNKVIIRADYIDPLYMKLAVEAQECW
RTKPLWKFYHERGRLCVMAGDGAQRVRRNYDDIAVDMGVSVLNVEDAKTRYNGAFKDAVYDVEVLVNERGGWAE
AKEALRSGIEASVDLGVKYVVAEIRELLLGTEGACVGVRTSMGEELKADRIILCTGPYTPKLLLDSDPAWTELHAGE
RIFAAVAEGLARMKDDEVWLVCHGVPVSSDVPASRPGASAGSTVGSVPHSKDKFLKFWGAKVIGNMVEDLATGIRIS
TPPSKPDYDQLNVPQSLKDDVSSAGEYLFGERGRAFHVENYRLCWEAVTPSDDFIISPASKGLYIATCGSFHSWK
FLPVIGKYVLMLEGOLESVASKWAWDRKRPSQSSRNWPKFELKDL*
```

>Orf3\_nt

```
ATGGCATCAACTAACAACAAGCTCTCAGTCCGAGCTGCTACAGCATCCTTACGACTGGAGTTGCTAACCACAACCG
CAAGAACAACAACAACAACAACCGTAACATTCTTTCCATGCAAGCCAGTCGCCATCTTGGCTTAGACCAAAGTA
TGATCGGAAACATCTTGCCATGTACGCCGTTCCAACGTGACGTCATGGAGCACGCTGCCAAGGATAGGCGGCGTGCT
GTCGGCCATGTCGTCTACGAGATCCCGAAGAATGTCGACATCGAGCGTCTTGGCCGCGCTTGGAAAGGAGGTTGTGCG
CCAGACTCCGGCCCTGAGGACTTGCATGTTTACGTTGGAATCCGGGGACCATTTACAAGTCATACTGTGCGACAGCT
TTAAGTGGGTGTACTTGAGTGGTCTGGACATGAACGAGGCGAGTCGCCGAAGAGGAAGGCCGAGCCGCTGTGACT
AGGAGCCAGTGCAACCGATATGCCGTCTACGAGAACCCCAACACAAAGCAAAGACTACTCATCTGGACATTCAGCCA
CGCGCTAGTGGACACCGTTTTTCCAGGAGCGCATCCTTGTAAAGGTGCTCAAAGTCTACCACGGCGGAGAAATCCAAC
ACTCTCTGGGGACAGAGTTAATAGTGAACCTCCCTCGCCAAAGATCCAGAACGGATAGCCAGGTTTTGGCAGCAGCAC
TTTGACGGTCTGATCGCCTCTGCATTTCTGCTCTACCGTCCCCCTGACTGTGCCCCGCCCCGATGCGCACGCAGA
ACATCGCATTTCTATCCAGGCTTGGCCCAGCAGGTATGGAACAACACGATCATTTGTCAAGCAGCGCTCGCAGTGC
TCCTTGCTCGATACACCATACTTCGGAGGCACTTTTTGGCGTTGTGGTGGAAACGGCCCCCCTTATTCAATGGTCTA
GAGCAACCCTCGATGGCCCAACGCGAACCATCGTGCCACACGTTGTGGTTTGGGATCCTCGCCAATCCGGATTAGA
TCTTATGCAAGCGATCAGTGCCCAAGATATGGCTGTACGTGAGTTTGGAGCAGGCCGGTCTTCATAGCATCCGCCGTG
CTGGAGACTTTGGGTCTGCCGCTTGTGGATTTGAAACCGTCTACTAGTCACTGCGAATAATGTGCCACAAGCGCAT
```

AGTTCTAGGCTTCATCGGGCCGATACAAAATCCGATAAATTTATACCGTATACGGATCGTGCCCTTTTACTCGACTG  
 CCAGATGGCCGATACGTCAGCATTACTTGTGCGACGATATGACCCGAGCTTAACTGATGACCGTCAAATGGCTCGTT  
 TCCTGAAGCAACTCGGCTATTTAATACAGCAATTCAGAGCCATGTGGTTAAACTGCCTATACGAGAACTCGATGTC  
 GTCACGCAAGAGGATCAGGCAGAGATCCAGAAGTGGAACTCGGGACTACTCCGGGCAAGTGAGTTGTGCATCCACGA  
 TGTGATAGAGGAGAGGGCAGCTGATACGCCATATGAACCCGCTGTGCTTGGTGGGATGGAGGATGGACATATGCTG  
 AGCTGGATCGTCTGTCTCGCCCTGCGGGGTATATTCAAACACATGATTTGGAATTAGGGCGGGTGGTACCATTA  
 TGCTTCGAGAAATCGAAATGGATCGTCGCTGCGATGCTGCTGTGCTCAAACACTGGCCGGGCGTTCACGCTCATTTGA  
 CCCAGCTTACC CGCAGCGAGGATCGCCAAGATCTGTGAGCAAACATCCGCAACAGTTGCTCTCGCTTCCAAAGTTC  
 AATATGAGGCTATATGTACTGTCTACCCAGTGCATTGCGGTGGATGATGAACTTTTTCAGTCACTGCCGCATGAT  
 GAAGATCATTTTCAGAACTATTGTGAAGCCGCAAGATCTAGCGTATATTCTCTTCACTTCTGGAAGCACAGGGGAACC  
 AAAAGGCAGTATGATTGAGCATCGAGGATTCACATCATGCTGCCTTGAGTTTGGTCTTAGAATGGGAATTAACAAAC  
 ATACACGCTCTCTTCAATTTGCCTCTTATGCTTTTTGGTGCCTGTCTGGTAGAAATCTTGGCAACCCTAATGCATGGC  
 GGCTGCGTCTGCATTCCTTCCGAGAACGACCGGATGAACGATGTTCCAGGCTTCATCAACCGCGTAGGAGTTAATTG  
 GGCCGTGTTCACTCCTTCGTTTATTGGGGCTATTACGCCAGAAAGTGTGCTTGGACTTCAAACACTGGTTTTAGGGG  
 GAGAACCAGTGTAGCAGAAATGAGAGACAACCTGGGCCTCAAAGGTTTCAGCTCATATACGTTTACGGCCAGAGTGAA  
 AGCTCAAGTGTGTGCAGTGTACTGAAGTCAAACAAGACACGGCTGAGTTGAATAACATTGGCGGGCGCTGTAGGCGC  
 CCGCTTCTGGATTACCGACCCTATTAACCCTGATCGATTAGCACCGATCGGCAGCGTTGGCGAGTTGGTTATTGAAA  
 GTCTTGGAAATCGCACGGGGATATGTTGTTGCTCCCCGAAGCAGAAATCCCCCTTCTTGTACC GCCCTGCTTGG  
 TATCCCGCAGCCAGCAGCTCGGCTCTGTAGATTCTACAGGACCGGAGATCTCGTCCGTTACAGATCCGATGGTAC  
 TGTTGTGTACTCGGGCGCCGAGATTCGCAAGTCAAACCTCGAGGACAACGGGTGGAGCTCGGCGACGTAGAAAAGTC  
 ATTTGCGACAACAATTGCCTAGCCACGTGATGCCCGTGGTTGAAAGCTGTGAGGAGATCCAACCGCTCCAACAGCACA  
 ACCTTGCTTGCCTTCTGATAGGTCCGTTCTACGATGGAGAGGACACTCCCCATACTACGTCGGCAATGGATGTCTG  
 CATTTTAGAGACTAGTGCTGCCAAGCGGATAAAGATAAAAATGCAAGAGGTTATTCTCAGCATTCGATTCATCGC  
 ACTTTATTTCGATGAAGCATCTCCCAACCCTACAACCGAAAGACAGACCGAAGAAGACTTCGATCCATCGGCACT  
 ACGCTGCTGGATGAAATGAATGTGAATGGAAGATCCTGGCCCGAAGAGAGGTTGCTCCAACAGCCAGTGCAGAGGT  
 CACGCTGCAACAACCTATGGTTTTCGAAGTTTAAATATCGATCCCAGCTCCAACAGCCACGGTGAAGCTTTTTCGAAT  
 TGGGCGGAGACTCTATTGCGGCGATCAAACCTGGTGAATATGGCGAGGTGCTTGGGATAGCGCTAGAAATAGCAGAC  
 ATCTTGCAAGACCCTACGCTCACC GGCTGGCAGCTACAATCCAAGGATTGTGCGACTCCACATAATCCAATTGCTCA  
 GACAAGATACCACGGACCCGTCGAGCAGTCGTTTTGCCAGGGCCGCTTGTGGTTTCTTAGACCAGTTCAAACCTTGGTG  
 CCTCGTGGTATCTGATGCCGCTCGCCGTGCGCCTGCGCGGGTGCCTCCATATCAATGCGCTCGCCGTTGCACTGGCT  
 GCTCTGGAGCAGCGGCAGGACTCTGCGAACGACATTCGAAGAGCAGGATGGTGTAGGCGTGCAGGTTCATCCAGAC  
 GAGCCGACTGAGGAGTTAAGAGTGATTGATGTATCGGCGCGGATGATAGCAGATACATCCAGTGTCTACAGA  
 ATGAACAGACCACCTTTCGATCTGGCGTCTGAGCCAGGATGGAGGGTATCATTTGCTACGACTGGGAGATGATGAT  
 CACATCCTCTCCATTGTATGCACCACATCATCTCTGACGGCTGGTCCGTCGATATCCTATGCCGAGAGCTCGACCA  
 ATTCATGCCGCAACACTCCGAGGCCAGGACCCGTTGTACAGGTGAGCCACTCCCCGATCCAGTACC GCGACTTTG  
 CCGTGTGGCAAAAGCAAGACGATCAAGTTGCCGAGCACGAACGGCAGCTCGAGTACTGGACCAAGCAGCTCACCGAC  
 AGCTCGCCGGCCGAATTTCTAACAGACCTACCCCGCCGGCCGTA CTCTCCAGCCAAGCGGGTGTCTGTCAGCTCAC  
 CATCGAAGGCTTGGTGTATGAGAACCTCCGAGCATTCTGCCGAGCTCATCAAGTAACATCGTTCCGCGGTGCTGCTCG  
 CGGCGTTCCGTGCAGCACACTACCGCCTCACGGGTGCAGAAGACGCGACTGTGCGGTACGCCAATAGCCAACCGAAAC  
 CGTCCAGAGTTGGAAAATATGATTGGATTCTTTGTTAACACCAGTGTATGCGTATTATCGTTGGGGAAGACGACAC  
 ATTTGAGGGATTGGTACGGCAGACTCGGTCTACGACAGCAGCGGCATTTCGCCAACCAAGATGTGCCTTTTCGAGCGCA  
 TTGTATCCTGCCTTCTCCCCGGCTCAAGGGACACGTCGAGGAACCCGCTGGTACAGCTCATGTTTCGCTTGCCTTGC  
 CAACAAGACCTTGGCAAAATCCAGTTGAAGGGTCTGGCAGGGGAGCTGTTGCCTAGCGTTCGCGACCACCAGGTTTGA  
 TGTTGAATTCACCTGTTCCAGGAGGCTGAAAGGCTGGTAGGCAGAGTGTATTTCTCCACAGACTGTTCTCGAGGCCA  
 CCACCATCGATGAGTGTGCTGCTTCCAGGAGACTTACGACAGAGGTTCTGAGGAGCTTTCAGGAGCTCAAGCCCAATCGTG  
 TCCCTGCCACTGACCGATGGTGTGGCGAAGCTTCGTAATATGGGCCTCGTTGACATTGACAGGATTGAGTACCCTCG  
 CGAGTCTAGCGTGGTAGATGTCTTCCGCGACCAGGTGGCAGCCTGTCTTAACGCCGAGCTGTGACAGACTCGTCCG  
 AGCAGCTGACATACGCTCAGCTGGACCAAAAATCTGACGAGGTTGCTAGCTGGCTGCGCCAGCAGCGTATGGCGGCC  
 GAGACTGTTGCGGGTGTGCGCCGCGGTGCTGTGACAGCGTTGTTGCCTTTTTGGGCATCCTCAAAGCGAACCT  
 AGCGTATCTCCCGCTCGACATCAATGTTCCCGCAGCTCGTATAAAAACAATCCTTTCAAGCCTACCTGGGCGCAAGT  
 TGGTCTTCTCGGTGCCGACGTTGGCTGCTCCGGATGTTCAACTTCCGGACATGGAGCTTGTACGTATCGACGACACG  
 CTTGGAAACCCTGGTGCAGTTGATTCTTACTGTGCGAAAGCAACCCTCTGCGACAAGCCTGGCATATGTCATCTT  
 CAGGTCGGGCTCAACCGGCGTGCCAAAGGGAATTATGGTCCACATCGTAGCTTGGTTAACGTCGTCACCCAACGAC  
 CCGCATATGGCGCTGTGCGCCACATGACAAACCTCGCTTTTCGATCCGTCAATATTTGAAATATGCATGGCATTACTA  
 AATGGATACAAGCTAGTTTGTATTGACACCATGACAGTGTTAGACGGAGTACACCTCACGTATATCTTCAAGCAGGA  
 GGATATCCGCTCGCATGATTACGCCTGCATTGCTGCCAGAGTCTCGACAAAGCCCCCTCAGGCGGGTAGGCCAAC  
 TTGAGGCACGTATGTCTCGGAGACCGGTTCCCTGACCAAGATGCAGCAAGCTAGAGAACTGGTGAGAACCACCC  
 GTGTTTTAATGGCTACGGGCCAAGCGAGAACTCGATCCTGACAACCTCTTTTACATCACCCCCGGTGTAAATGTGTAC  
 CAACGGCGTACCTGTTGGTTCGAGTGATAAAACAACCTCGGGCGTGTATGTTCATGGATCCGCAGCAGCGTCTGGTCTCTC  
 TCGGTGTTCATGGGCGAGCTGGTGTGACCGGTGACGGGCTCGCACGAGGATATACCGACCCTGACCGAGACCAAGAC  
 CGTTTCGTACAGATCATAGTCGATGACAAGCCGATGAAGGCCTTTTCGAACAGGGCAGCCGGGTGCGATAACCGACCGAC  
 GGACGGTCAACTAGAGTTTTATGGCCGTATGGACAATCAGGTGAAGGTTTCGAGGTCACCGTGTGCGAGCCCGAGAAA  
 TAGAACGCGTCTTAGTCAGACACAACGCCGTAAGAGATGCTGTTGTTTTATTGAAGCGCCACGGAGATACACAGCAG

GATGTCGAACTTGTGGCTTTATCACAGTAGTAGAGGACCAGAGTATGATAAGAGCTAACCAAAAGCTAACCGACCA  
CGCAAGAGAATCCGCCAGCTAGAGGAGGAAGAAGATGATGAGGTGAAGATGGCGCAGTTGGATCCGAATGTGGAGG  
CAAATCTACGCTCTGTGCTTCAAGCCACTCTACCGTCGTACATGGTTCCATCGCGGATTATTGTGTTGGACCAGATG  
CCGCTGAACACGAACGGCAAGGTTGACCGGGGGTGTAGCACGGTTGACATTGAGCGCACCAACAAACCGAGAATC  
ACGCACCGTTGTGCGCCACCGAACGAGATCGAAGTTTTCGCTGTGTGAGGAGTTTCGCCGACGTGCTCGGCGTCGAGA  
TAAGCATCACTGATAACTTCTTCAATCTTGGAGGCCACTCCCTCATGGCCACCAAGCTCGCTGCTCGCATCAGCCGT  
CGACTGGATAACCCGTGTGTCCGTCAAAGATCTCTTCGACAACCCCTGTCTGGTTCGATCTCGCAGCTATTATACGCCG  
AGGCTCAACCCACATAAATTCATCCCTCCGACAACGTACCACGGACCCGTCGAGCAGTCTTTGCTCAGGGCCGCC  
TATGGTTTCTAGACCAGTTCAACCTCGGTGCATCGTGGTACCTCATGCCGCTCGCCGTGCGTCTGCGCGGGTCGCTC  
CACATCGACGCGCTCGCCGTTGCACTGGCTACTCTGGAGCAGCGGCACGAGACTATGCGAACGACATTCCAAGAGCA  
GGATGGTGTAGGCGTGCAGGTCGTCAGACGAGCCGCACTGAGGAGTTAAGAGTGATTGATGTATCGGCCGGCGCGG  
ATGACAGTAGCTATATCCAGTTATTACAGAATGAGCAGACCCTCCTTTCGATCTGGCGTCTGAGCCAGGATGGAGG  
GTATCATTTGCTACGATTGGGAAATGATGATCACATCCTCTCCATTGTGCATGCACCATATTATTTCTGACGGCTGGTC  
TATCGATATTTCTTGGCCGAGAGCTCAGCCAATTCTACGCAGCAACACTCCGAGGCCAGGACCCGTTGTGCGAGGTGA  
GCCACTCCCGATTCACTATCGCGACTTTGCCGTGTGGCAAAAGCAAGACGATCAGGTAGCCGAGCAGAACGGCAG  
CTCGAGTACTGGACCAAGCAGCTCACCGATAGCGCCCTGCCGAACCTTCTGAAAGATCTCCCCCGGCCGCCATACT  
GTCTGGCAAGGCCGGTGTGCTGCAGCTCACCATCGAGGGCTCTGTGTACGAGAGACTCCGAGCATTTCTGCCGGGCTC  
ACCAGGTAACATCCTTTCGTGGTTCTGCTCGCGGTGTTCCGTGCAGCGCACTACCGTCTCACAGGTGCGGAGGACGCG  
ACTGTTGGTACGCCAATAGCCAACCGAAACCGTCCAGAGTTGGAAAATATGATCGGCTCCTTTCGTC AACACTCAGTG  
TATGCGGATTACGATTGGTGATGGCGATACATTTGAGGAGTTGGTGCGGCAGACCCGGTCAACGGCAACGGCCGAT  
TTGCAAAACAGGATGTCCTGTTGAGCGTGTCTTTCCGCTCTTACCCGGCTCGAGAGATATATCAGGAAATCCG  
CTGGTTTCACTTATGTTTCGAGTCCACTCTCAGGAGGATCTCGGTAATAATCCAGTTATCAGGCTTGGTAGGCGAGCA  
TATGATCCCTACTGTATCAACTCGCTTCGACGTTGAGTTCCACTTATTCCAGGAAGTGGGAAGGATGAGCGGTAGTG  
TGCTCTTTTCCACAGACCTGTTTCGAGTCTACCACCATCCGCGGCATGGTGTCTGTCTTCCAGGAAATCTTACGACGG  
GGTCTTGAGGAGCCTCAAACGCCAATCGTATCCTTGGCGCTGACCGACGATCTGGCCGAGCTTCGTAGCATGGCCCT  
ACTTGATATCGAGCGAAGTGGGTACCCACGCGAGTCTAGCGTGGTGGATGCGTTTTCGTGAGCAGGCAGGCGCTGTC  
CTGGCGCCACAGCTGTGAAGGACTCGTTCGAGCAGCTGACCTACACTCAGCTGGACCGACAATCCGACGAGGTTGCT  
AGCTGGCTGCGCCAGCAGCGCATGGCTGCCGAGACACTGGTCCGGGTGCTGGCGCCGCGGTCGTGTCAGACAGTTGT  
TGCTTTTTTGGGCATCCTCAAAGCGAACCTAGCGTATCTCCCGCTCGACATCAATGTTCCCGCAGCTCGTATAAAAAG  
CAATCCTTTCAATGGTATCAGGGCGCAAGTTGGTTCTTCTTGGCGCCGACGCGGCTGCTCCGGACGTTTCACTTCCG  
GACGTGGAGCTTGTGCGTATCGACGACATGCTTCGTAACCCCTGGTGCAGTTGATTCTGATTCTTACTGTGCGAAA  
GCAACCTTCTGCGACAAGCTGGCATACTGATCTACGTCGGGTTCAACTGGAGTGCCAAAGGGTGTATGCGCCG  
AGCATCGTAGCATCTTAAGGCTCGTGAAGGAGGATGTAATGTCGTATCTAGGCTGCCACGCGACCTCGCATGCGCAT  
CTTTCAAGTATTGCTTTGATGCCTCGACGTGGGAGATCTATTCCGCGCTACTAAACGGTGGAAACGGTGATCTGTAT  
CGACTACTTTTACAGCCTTGGACAGTAAGGCTCTCGAGGCAAGTGTTCGAACAAGAACAATAATCCGTGTGGCCACACTTC  
TCCCTGCTTTGCTCAAACAATGCTTAGCCAGCATACTGCTACGATCGGGGCTTAGAAGTACTTTACACCGGTGGA  
GATCGGCTAGACAGTCTGTATGCGACCGAGGCACGAGCGCTTGTCCAGAGTGCCGCTACAATGTGTATGGCCCTAC  
CGAGAATGCGGCCATCAGTACTATTTATGCCATTGAGGAGCATGATCTATTTGTTAATGGGGTTTCTATCGGCCGTG  
CCATCAGCAACTCTGGTGCCTACATCTTGGACTCATCTCAACAGCTTGTCTGTCGGTGTGATGGGAGAGCTTGTGTC  
GTCACCGGAGATGGGCTTGGCAGAGGGTACACCGATCCATCGCTGGACCTGAACCGCTTCGTCCAAGTTTCTATTGA  
TGGCCAGCTTGTGAGGGCATATAGGACGGGGCAGCCGAGCAGATACCGGCCGAAGGATGGCCAGATCGAGTTCTTTG  
GACGTATGGACCAGCAGATCAAAATCCGAGGCCACCGCATCGAGCCGGCCGAGGTGGAGCATGCCATGCTCAGCCAC  
AATGCAGTCAGCGACGAGCTGTCTGTCGTCGGATGCCAGAGGGTTCGAGAAAGGCAAGAGCCGAAATGGTAGGCTT  
TGTAGCCGCCCGGAGCGGATGAATCTATCAACATGCTTGGTTCAGCCAAAGACGGATTGGAGATCGAAGAAGTCGAG  
AAAAGGCTTCCGCGGCAGACAGAAAACGAGATACAAAATTCGTTTTCGAGACCTTGTCTCCACATACATGATCCCG  
ACGCGTATCGTGGTGGTAGACCAGATGCCAGTCAATGCAAAACGGCAAGGTTGACCGCGGGCGCTGGCACGGTTGAC  
ATTGAGCGCACCAACAGACCAAGAATCACGCACCGTTGTGCGCCACGGAACGAGATCGAAGTTTTCGCTGTGCGAGG  
AATTTGCTGATGTCCTCGGTGTGAGATAGGCATCAATGATAACTTCTTCCATCTTGGAGGCCACTCCCTCATGGCC  
ACCAAGCTCGCTGCTCGCATCAGCCGTGACTGGATAACCCGCGTGTCCGTTAAAGATCTCTTGCACAACCTGTCTT  
TGTGATCTCGCAGCCATCATCAGCCGAACCTCAACTCCACATAGTGCAATCCTTCCGACAGCGTACCACGGACCCG  
TCGAGCAGTCTTTGCTCAGGGCCGCTATGGTTTCTAGACCAGTTCAACCTCGGTGCTCGTGGTACCTCATGCCG  
CTCGCCGTGCGCTGCGCGGGTGCCTCCACATCGACGCGCTCGCCGTTGCACTGGCTACTCTGGAGCAGCGGCATGA  
GACTCTGCGAACGACATTGCAAGAGCATGATGGTATAGGCGTGCAGGTCATCCAGACGAGCCGCACTGAGGAGTTAA  
GAGTGATTGATGTATCGGCCGGCGCGGATGATAGCAGATACATCCAGTTGCTACAGAATGAACAGACCCTCCTTTC  
GATCTGGCGTCTGAGCCAGGATGGAGGGTATCACTGCTACGATTTGGAGATGATGATCACATCCTCTCCATTGTGAT  
GCACCACATCATCTGTATGGTGGTCCGTTGATATCCTATGCCGAGAGCTCAGCCAATTCTATGCCGAAACACTCC  
GAGGCCAGGACCCGTTGTGACAGGTGAGCCACTCCCGATTCAAGTATCGCGACTTTGCCGTGGCAAAGCAAGAC  
GATCAGGATAGCCGAGCAGAACGGCAGCTCGAGTACTGGACCAAGCAGCTCACCAGATAGCGCTCCTGCCGAACCTCT  
GAACGATCTCCCCCGGCCGCCATACTGTCTGGCAAGGCCGGTGTGCTGCAGCTCACCATTGAGGGCTCTGTGTACG  
AGAGACTCCGAGCATTTCTGCCGGGCTCACCAGGTAACATCCTTTCGTGGTTCTGCTCGCGGTGTTCCGTGCAGCGCAC  
TACCGTCTCACAGGTGCGGAGGACGCGACTGTTGGTACGCCAATAGCCAACCGAAACCGTCCAGAACTGGAAAGCGT  
GATTGGTTTCTTTGTCAACACTCAGTGCATGCGGATTACGATTGGTGTGATGGCGATACATTTGAGGGATTGGTGCGGC  
AGACCCGGTCAACAGCGACGGCCGATTTGCAAAACAGGATGTCCCGTTCGAGCGTGTGCTTTCGGCCCTCTTACCC

GGCTCGAGAGATACATCACGAAATCCGCTGGTGCAGCTTATGTTTCGAGTCCACTCTCAGGAAGATCTCGGTAAAAAT  
CCAGTTATCAGGTCTGGTAGGCGAGCATATGATCCCTACTGTATCAACTCGCTTCGACGTTGAGTTCCACTTATTC  
AGGAAGTGGGAAGGATGAGCGGTAGTGTGCTCTTTTCCACAGACCTATTCGAGTCCACCACCATCCGCGGCATGGTG  
TCTGTCTTCCAAGAAATATTACGACGGGGTCTTGAGGAGCCTCAGACGCCAATCGTGTCCCTGCCACTTACCGATGG  
TGTGGCGAAGCTTCGTAGTATGGGTCTCGTCGACATTGACAGGACTGAGTACCCACGCGAGTCTAGCGTGGTGGATG  
TGTCCGCGACCAGGTGGCTGCTTGCCTGACGCCACAGCTGTGAAGGACTCGTCGACGAGCTGACCTACACTCAG  
CTGGACCGACAATCCGACGAGGTGCTAGCTGGTTGCGCCAGCAGCTATGGCTGCCGAGACACTGGTCGGGGTGCT  
AGCGCCGCGTGTGTGTCAGACAGTTGTTGCCCTTTTGGGCATCCTCAAAGCGAACCTAGCATATCTCCCGCTCGAC  
TCAATGTCCCTGCAGCTCGTATTAATAAACATTCTTTCAAACGTACCAGGGCACAAGTTAGTTCTCATCGGTGTGAC  
GTGGCTGCTCCGGATCTCCAGCTTCCGGAAGTGGAGGTGGTAAGTATTGGCGACACTCTAGGCCAAGATTCTCCAGT  
TGATTTTCCAGTCGCCTCCTTGCAGCCTACCACAACAAGTCTTGCATACGTCATCTTACGTCGGGTTCAACTGGAG  
TGCCAAAGGGTGTATGGCCGAGCATCGTAGCATCTTAAGGCTTGTGAAGGAGAGTAATGTGTATCTAGGCTGCCA  
CGCGCACCTCGCATAGCGCACCTTTCTAGTATTGCCTTTGATGCCTCGACGTGGGAGATCTATTCCGCGCTACTAAA  
CGGTGGAACGGTGTATCTGTATCGACTACTTTACAACCTTGGACAGTAATGCTCTCGAGGCAGTATTGCAACAAGAAC  
AAATCCGTGTGGCCACGCTTCTCCCTGCTTTGCTCAAACAATGCTTAGCCAGCATAACCCGCTACGATCGGGCCCTTA  
GAAGTACTTTACACCGGTGGAGATCGGCTAGACAGTCTGTATGCGACCGAGGCGCGAGCGCTTGTCCAGAGTGCCGT  
CTACAATGTGTATGGCCCTACCGAGAATGCGGCCATCAGTACTATTTATGCCATTGAGGAGCATGATCTATTTGTTA  
ATGGGGTTCCTATCGGCCGTGCCATCAGCAACTCTGGTGCCTACATCTTGGACTCATCTCAACAGCTTGTTCCTGTC  
GGTGTGATGGGAGAGCTTGTGCTCACCGGAGATGGGCTTGCAGAGGGTACACCGATCCATCGCTGGACCTGAACCG  
CTTCTTCCAAGTTCTATTGATGGCCAGCTTGTGAGGCGATATAGGACGGGCGACCGACAGCATCCCGCCGAAGG  
ATGGCCAGATCGAGTTCTTTGGACGTATGGACCAGCAGATCAAATCCGAGGACCAGCATCGAGCCCGGAGGTG  
GAGCATGCCATGCTCAGCCACAATGCAGTCAGCGACGAGCTGTTGTGCTCCGGATGCCAGATGGTCAAGAGGGTCA  
AGAACGTCAAGAGCCGAAATGGTTGGCTTTGTCGCGCCCGGGGCGACGAATCCGTCGAGCAGGACGCGGCTACCG  
GTCACGTGGAAGGTTGGGAGACTACTTTGAAACGAATACATATGTAGATATCGAAACATTGGCCAGACTGCCATT  
GGCAGCGACTTCGTTGGCTGGACATCCATGTATGACAAGAGCGAGATTGACAAGGCTGAGATGCAGGAGTGGCTCGA  
TGATACTATGCAGACACTCCTCAACGGCCAGGACCCTGTCCATGTATTTGAGATAGGCACCGGCACTGGTATGGTCC  
TATTCAATCTCGGCGACGGCCTACAGAGCTACGTTGGCGTCAACCGTCCGAGGCTGCGGCTGCCCTTCGTCACGAT  
GCCATTAAGTCAATCCCTGCTCTCGCAGGCAGGGCTGAGGTACATGTCCGCACGGCCACGGATGCAGGCCGTCTGGA  
TGGGCTCCATCCAGACCTGGTCTGGTCAATTCGTTGGTCCAGTATTTCCCCACGCGGAGTATTTGATTGAAAGTCG  
TCGACGCTCTGACTCGACTACCAGGCGTCAAACGTTTATTCTTTGGTGACATACGGCCCCACTCTCTTAACAAAAGAC  
TTCTTCGCGGCCAGGGCTCTCCATGTGCTAGGCGGAAAGGCGACTAAAGATGGAGTGCAGCGGAAGATGACAGAAAT  
CGAAGAGCGCGAAGAAGAGCTAGTCTGATCGACCCGCTTTTTCAGCAGCTAGCAGGCGGCTCCAGGTCAAATCC  
AGCATGTGAGATTCTACCCAAAAGAAATGATAGCGACGAACGAGCTTAGCTCGTACAGGATGTGCTGTCGTGCAC  
GTGGGCGATCCCGACAAGCAAATGCAGGCTGTGCATGAGATCGATGCAGATGCTTGGATCGATTTCAAACCTCTCA  
GATGGACCGTCAGGCCCTACTCCGCCTTCTACAGAGCTCGCCAGACGCTTACTGTCTCCGTCAGCAACATCCCTT  
ATAGCAAGACCATTGTAGAGCGACATGTTAGAATGTGCTTGTGATAAAGCAGTGCAGATGCAGACGATGGATAGG  
ATCGCCTGGGTCTCTGCTGTCCACCATAGAGCGGATCGGTGCGCGTGCATGTCCGACGCGACCTCCTGCAAGTAGG  
CGAAGAGACAGGCTTCCGCGTGGAGGTCAGTTGGGCGCGACAGCAGTCCAGAACGGCGCACTTGTATGCCGTCTTCC  
ACCCTATACACCTGCCGCGAGTAAGCAGCGCATTATGATTAGATTCCCGACTGACGACCAGACCCGGCCAGTGGGC  
TCTTTACGAACAGGCCGCTACAGCGGCTACAGGGCCGGCGGATCGAGGGACAGATCCGTGAAAGATTGCAGGCTCT  
CCTCCCGCGTACATGATCCCGACGCGTATTGTGGTGTAGACCAGATGCCTGTCAACGCAAGCGGCAAGATCGACC  
GGCGAGAATTACTCGAAGGGCCAGGTTGCACCAAAAAGGAATGTAGCGTCTTCTCGCGTGGCTCCACGGAACGAG  
ATAGAAGTCTGTGTTGTGCGAGGAGTTTGGCAGGTTCTTGGCGTGCAGGTCGGCATTACCGACAATTTCTTCCATCT  
CGGTGGGCTTCCCTGATGGCCACACGCTGTGCGCTCCAGGATTAATCGGCGGCTGAATGCGTTGATCAGGTCAGG  
ATGTTTTTGTTCGCCGTTTGTGCCGATCTAGCGGACCTTCTGCGCAGTTGTTTCGAGGACACACATACGTCGCC  
ATCCCGCGCACTCAGGTCGACGGCCCGGTTGAACAGTCTTCCGCAAGGCCCTTTGTTCTTGGACCGCTTATA  
CCCGCAGTCGACCTGGTATCTCATGCCGTTTGAACGCGAATGCGAGGGCCCTGCACCTGGATGCTCTCAGCGCGG  
CGCTTCCAGGCGCTAGAGGAACGCCATGAACCGCTTCCGACCACATTTGAGCACCAGGATGGCGTAAATCTCCAAGTT  
GTGCATCCATTTGCACCGAAGAAGCCGAATTTTCATCCACGTGCCTGAAGGCAGTTGGAAGATTCTTACGCAAGCCTT  
GCGGCAGGAGCACACTACGCTTTCAATCTCGAGATCGAGCCTGGGTGGAGGACATCAATCTTCCGCTAGGTGAAG  
AGGACCATGTGCTCTCAATTATGATGCATCACATCATCTCTGATGGGTGGTCTGTTGATATCTCCAACGTGAAC  
GCCGCTTCTATGCCGCCACAATCCGGGCCAAGACCCGCTGTCACTTGCAGCTCCTCTACCAATCCAATACCGGGA  
CTTTGCCGTATGGCAGAAGCAGGAAGCGCAGAATGTTGAGCATCAACATCAACTAGATTATTGGAAAACAGCAGCTGG  
ACGGAAGCCAATCGGCTGAGTTGCTCTACGACAAGCCCGGCCAGCCGTGCTATCCGGGAAGGCTGAAGTGCACGAA  
ATCGTAATCAACGGCGCCCTATATCGTAATCTCCAGCAGTTTGTGAAGTCTCATCAAGTAACGCCCTTCGAGTGTCT  
GCTCGCCGATTTCCGGGCGACACACTACCCGACTACCCGAGTGGAAAGTGCAGCAATAGGACGCAATCGCGAAC  
GGAACCCGAGGAGGCTGGAGCCTCATTGGCTTCTTCTGCAATGCTGTGATTCTGATTCATTCAGTCCAGGACGAG  
ACCTTTGAAGCGCTTGTGCGGAGGTTGGAATACGACTGCAGCAGCTGCAAAACCAGGACGATACCATTCGAGAT  
GCTTGTGTCAGAACTTGCACCTGGCGCCCGGACCTTTCTCGCAATCCTCTTGTCCAGATGACCTTCCGCGCTTCACT  
CCCAGCGGAACATCGGCTACCTTCGCTTGGATGGGTTAGAGACACAACCTCTCGGAGAAGTGGCGACGTCAAGATTT  
GATCTCGAGTTCCATTTCTACGAGGAAGATGACCGCATGCGCGGCGCCGTTATATTCTCCGACGAGCTTTTCGATCC  
AATGTCCATCCACTCTATGACATCGGTGTTCTTTGAAGTTCTCACCCGTGGGCTCAAGGATCCGACAGCCCGTATTG  
CGACCATGCCCTGACCGATGGCCTCTCCATGCTCACGGACATGGGACTCACGTGCATAGAGCCGACGGACTATCCA

CGGGATTCAAGCGTGCCGGTCTCTTCCGCCAGCAGGTGGCCATTTGCGGAGAAGCGGTAGCCGTCAAAGACGGTTC  
 CACCCAGTTGACATACGCAGAATAAACCTCCAATCGGACCAGGTGGCCTGCTGGCTGGCCAGCGAGGATTTGCTC  
 CCGAGACCATGATTGGTGTGCTGGCCCCGCGCTCTTGCAGACAGTTGTGGTCTTCTCGGAATACTCAAGGCCAAC  
 TTGGCATACTGCCGCTCGATGTGAACGTGCCGCTCGCCGACTCGAGAGCATCCTGTCCGCACTCCATGGCCACAA  
 GCTCGTTCTCTCGGGCGCGGACGTGCCCCCTCCGACCACGGGGCTGAGTGACATCGAGTTCTCGCCATTACGAAGA  
 TACAAGGCCAGCAAGTTGTGGGGTGGCAGGAAACTGCTGCCGCGCTCCCGATCCCTTCGCCGACGAGCCTTGCATAT  
 GTGATGTTACATCAGGATCGACTGGCCAGCCGAAGGGTGTATGATCGAGCATCGGGGCATCGTGCGACTGGTGAG  
 GGAAACGAATGTAATCTCACAACAGAAGCGGGCTTCCCGTAGCTCACGTATCCAACCTCGCCTTCGACGCGGCAA  
 CCTGGGAGATCTATGCGCCCCCTTCTGAACGGCGGCACGGTAGTGTGTATCGATTACATGACGGTGTGGATGCCGCC  
 GCCTTGGGCCAAGTATTGGCAGGAGAAAAAGTCCGGGCTGCCCTGTTTACGCCAGCTTGTGTAACAGTGCCTCAG  
 GGATGCACCTGCGGCTCTTGGCGGATTGACAACCTCTTGGCGTCAGGAGATCGGCTGGATTCCCGTGACGCAACCC  
 AGGCGAGGAAGTTGTTAAACGGCGATCTTATCAATTCATGTGGACATACGGAAAAACAACATTTAGTACTATCTAC  
 CGTGTTCACAAAACGAGAGCAGCGTTAATGGCGTGCCTATCGGCAGCGGATCAGCCACTCTGGGGTGTGGTGAT  
 GGACTCGCAGCAGTGTCTTGTGCCGCTCGGGGTGATGGGCGAGCTCATTCTTACGGGTGATGGGTTGGCTCGAGGGT  
 ACACTGACCCGGCACTAGACCGTGCACGGTTTATCACGGTAACGGTCAACGGGGGATCCGTTAAGGCATATCGCACT  
 GGAGACCGCGTGCCTACCGCCCCGGTGGACGGCCAGCTCGAATTTTTTCGGACGCATGGACCATCAAGTTAAGATACG  
 TGGACATCGTGTGAGCTGGCAGAGGTGAGCACGCCTTGTCCGCAACAGTTCCATCAGCGATGCCGTTGCCCTTGG  
 TCCGAGAGCCGGACGGCGAGGAGGGCGGCTAGTCAGCTTTCGTACCATCCTTTCCGGACAGACTCTGTTCCAGCCC  
 AAGCAGGGAGAGGAGCGGGGAAGGAGGCCAGGTGGAGGCATGGGCAGACCTTTTCAATTCCTAACACCTATGCCGA  
 TATCAACACTATCGACACTGCCAAGCTTGAAGAGATTTATGGGATGGACGTCAATGTATGATGGAGCCGATG  
 ACCGCGGCGAGATGAACAGTGGCTGCACGACAGATCACAGCCATTCAAAGTGGTGGGCGAGCCGCAACGCTTT  
 GAAATTGGAACAGGTACCGCATGATTCTGTTCAACCTCAGCGATGGACTTCAGAGTTATGTCCGGCTCGACCCATC  
 TGCATCGGCTGCCACGTGGGTTACCAAAATGTGCAAGGCAAAGCCTGGCCTGACAGAGAAGATCGATGTCCGAGTTG  
 GCACGGCGGCAGATGTTGGCCAACCTGGGGCAGGTTAATTCCTCCAGAGCTAGTTGTGATCAACTCGGTGGTGCAGTAC  
 TTCCCTAGTGCAGAGTACCTGTCTACCACGGTGAACGGCTCCTTCGGTTAAATGACCTGGACCGTATCTTCGTCCG  
 TGATGTGCGCTCCTATCCCCTCTATCGGGACTTCGGAGCTACCAAGGGCCTGCATGTGCTCGGCGCATCGGCCACCA  
 AGGAAACCTCTGCCGGCAGCTAGTGGGCATGGAAGAAGCTGAGGAGGAGTTACTCGTCGACCCGGCCTTCTTTACA  
 AGCCTGGCAAGCCGATTGCCCGATCTCGTTGAGCACGTTGAGATTCTGCCAAAAAAGATGAAGGGCAGAAATGAGCT  
 GAGCTGCTACCGCTTTGCGAGCAGTGATACACGCTAGACGCAAAGGCGGGCAGGCCCGGGCGGATCCTCGAGGTGGCGG  
 AGGACGCGTGGATCGACTTCCAGGCGCATCAGCTTGACCGTGTAGGACTTGTGGCCTCTTGCAAAACCTCTCTGCT  
 TCGTCTATCGTAGCTGTGAGCCACATTCCTTACAGCAAAACCGTCTTAGAACGGGATCTCGTCAATTCACTGGACAG  
 CGAAGCTGCGGAAGGGCTACCGAAGTGAAGTGGCTGGGACTGGCTTATGTCGATCCGCGATGCAGCTCACGCGCTCCCTG  
 CGTTGTGCTAGCTTTTGACATAGAAGAGCTGGCTCAGGAGGCGGGTTCGCGGTGGAGGTCAGCTGGGCGCCGCAACGG  
 TCTCTACGGGGCGCATGGACGCCGCTTCCACCGTTTTCAAGGGCAGAGGCCGTTGTTTTCGTTTCCCCACTGATTA  
 TCAAGGCTGCTCAAAGGATTCATTTACTAACCAGGCACTCCGGCGGCAGGAAACCCAGAAAAGTCAAGCCTACCTGC  
 GCGCCAGCTGCTGGTCACTGCCATCCTACATGATCCAGCACGGATTAGTGTGCTGGACGAGATGCCCGTCAAT  
 GCAAACGGAAAGGTGACCGGCGAGCTCTAGCGCAGATGGCAGTGGGGCCAGCGACAATTAGAAGTGACGAAACGAT  
 AGTTCCCCCGCGGAGCGACGCGGAGCGGGCTCTCTGCGAAGAGTTTGCACACTTACTGAGCGTCGAGGTGCGTATCA  
 CCGACAACCTTCTCCATCTTGGAGGCCACTCCCTCATGGCCACCAGGCTTGCTGCTCGAATCAGCCGTCGACTGGAT  
 ACCCGTGTGTCCGTCAAAGACGCTTTCGACCACCTGTCTCGTTGATCTCGCAGCCATCATCCGCCGAGGCTCGAC  
 TCCACATAATCCAATCCCCGCAACAACGTACCGCGGACCTGTGCGAGCAGTGGTTTGTCTAGGGCCGCTATGGTTCC  
 TAGACCAGTTCAACCTCGGTGCATCGTGGTACCTCATGCCGCTCGCCGTGCGCCTGCGCGGGTTCGCTCCATATCAAT  
 GCGCTCGCCATCGATTGGCTGCTCTGGAGCAGCGGCATGAGACTTTGCGAACGACATTCGAAGAGCACGATGGTGT  
 AGGCGTGCAACTCATTCAGACGAGCCGCAAAAGAGTGGAGATAATTGATGCATCGGCCGCGCGGATGACAGCA  
 ACTACATCCAGTCTACACAATGAACAGACAACTCTTTCGATCTGGCGTCTGAGCCAGGATGGAGGGTATCATTA  
 CTACGATTAGGAGGTGATGATCACATCCTCTCATTGTATGCACCACATCATCTCCGACGGCTGGTCCGTCGATAT  
 CTTGTGCCGAGAGCTCGGCCAATTTCTATGCCGACGACTCCGCGGCCAGGACCCGTTGTGCGAGATGAGCCCGCTCC  
 CAATCCAGTACCGGACTTTGCCGTTGGCAAAGCAAGATGATCAAGTTGCCGAGCACGAACGGCAGCTCGAGTAC  
 TGGATCAAGCAACTCGCCGACAGTGTCTCTGCCGAACCTTCTGAACGATCTCCCCCGCCAGCCGACTGTCCGGCAA  
 GGCCGGTGTGTCGAGCTCACCATCGAGGGCTCTGTATATGAGAGACTCCGAGCATTCTGCCGAGCTCACCAGGTAA  
 CATCCTTCGTGGTCTTACTCGCGCATTCGTCGCGCACACTACCGTCTCACGGGTGCGGAAGATGCGACTGTCCGGT  
 ACGCCGATCGCCAACCGAAACCGTCCAGAGCTGGAAAGCATGATTGGATTCTTTCGTTAACACTCAGTGTATGCCGAT  
 TACCGTCCGAGACGATGATTCAATTTGAGGGATTAGTGTGTCAGACCCGGTCAACAGCGACAGCCGATTTGCAAACC  
 AAGATGTCCCGTTCGAGCGTGTGCTGTGAGCCCTTACCTGGCTCGAGAGACACATCGAGGAACCCGCTGGTGCAG  
 CTATGTTCCGCTTGCCTCAACAGGACCTTGGCAGTATTAGTGTGAGGGTTTGGCAGGGGAGCTGTTGCCAG  
 CGTCCGACACCAGGTTTGTATGTTGAATTTCCACCTGTTCCAGGAGGCTGAACGGCTAGTCCGCGAGCGTCTTTT  
 CTACAGACTATTCTGAGTCCAACACCATCCAGCGGTTGATCTGTCTTCCAGGAAGTTTACGCTCGTGGCTCTAGAG  
 GATCCCCAGACCCAATCGTGTCCCTGCCGTTACCGAGCTTGGCCGAGCTTCGTAAGCAGTGGGTTCTGTCGATAT  
 CGAGAGGACCGAGTACCCTCGCGAGTCTAGCGTAGTAGATGTCTTCCGCGACCAGGTGGCCGCTGTCTGACGCTA  
 CAGCTGTGATAGACTCGTCGACGAGCTGACTTACGCTCAGCTGGACGAAAAATCTGACGAGGTGCTGGCTGGCTG  
 CGCCAGCAGCGCATGGCTGCCGAGACACTGATCGCTGTGCTGGCGCCGCGGTGCTGTGACAGCGTCTGCTTTT  
 GGGTATCCTCAAAGCGAATCTAGCATATCTCCGCTCGACGTCAATATTTCCCGAGCTCGTATAAAAAACAATCCTGT  
 CAAACCTACCAGGGCGCAAGTTAGTTCTTCTTGGCGCCGACGTGGCTGCTCCGGATGTTACGCTTCCGGACGTGGAG



CTTGTACGTATCGACGACACGCTTGGTAACCCTGGTGCAGTTGATTCTCTTACTGATGGAAAGCAACCCCTCGCGAC  
 AAGCCTGGCATATGTCATCTTCACGTCGGGTTCAACCGGCGTGCCAAAGGGAATTATGGTCCCACATCGTAGCTTGG  
 TTAACGTCGTCACCCAACGACCCGCATATGGCGCTGTGCGCCACATGACAAACCTCGCTTTCGATCCGTC AATATTT  
 GAAATATGCATGGCCTTATTGAACGGATACAAGCTAGTTTGTATTGACACCATGACAGTGTTAGATGCGGTACACCT  
 CACACATATCTTCAAGCAGGAGGATATCCGCGTCGCGATGATCACGCCTGCATTGCTGACCAGAGTCCCTCGACCAAG  
 CCCCTCAGGCGGTAGGCCAACTTGAGGCACTGTATGTCTCGGAGACCGGTTCCCTGCCGAAGATGCAGCCAAGGCT  
 AGAGAACGGTGAGAACAGCCGTGTTAATGGCTACGGGCCAAGCGAGAACCTCGATCCTGACAACCTCTTTTACAT  
 CACCCCGGTGTAATGTGTACCAACGGCGTACCTGTTGGTCGAGTGATAAACAACCTCGGGCGTGTATGTCATGGATC  
 CGCAGCAGCGTCTGGTCTCTCTCGGTGTATGGGCGAGCTGGTCTGACCGGTGACGGGCTCGCACGAGGATACACC  
 GACCCTGACCGAGACCAAGACCGTTTTCGTACAGATCATAGTAGATGACAAGCCGATGAAGGCTTTTTCGAACAGGCGA  
 CCGGGTGCATACCGACCGACGGACGGTCAACTAGAGTTTTATGGCCGTATGGACAATCAGGTGAAGGTTTCGAGGTC  
 ACCGTGTGAGCCCGCAGAAATAGAACGCGTCTTAGTCAGACACAACGCCGTAAGAGATGCTGTTGTTTTATTGAAG  
 CGCCACGGAGATATACAGCAGGATGTGCAACTTGTGGCTTTATCACAGTAGTAGAGAACCAGAGTATGATAAGAGC  
 TAACCAAAAGCTAACCAGCACGTAAGAGAATCCGCCAGCTAGAGGAGGAAGATGATGAGGCCAAGATGGCGCAGC  
 TGGATCCGAATGTTGAGGCAAATCTACGCTCTGTGCTTCAAGCCACTCTACCGTCGTACATGGTTCCATCGCGGATT  
 ATTGTGTTGGACCAGATGCCGCTGAACACGAACGGCAAGGTTGACCGGCGGGCACTGGCACGGCTGCATTGAGCGC  
 GACAACAGACCGAGAATCACGCACCGTTGTGCGCCCCCGTAATGAGATCGAAGTTTCACTGTGCGAGGAATTTGCTG  
 ATGTCTCGGTGTGAGATAGGCATCACTGACAACCTTCTTCAATCTTGGAGGCCACTCCCTCATGGCCACCAAGCTC  
 GTGCTCGCATCAGCCGTGACTGGATAACCGTGTGTCCGTCAAAGACGTCTTCGACCACCCGTCTCTCGTCGATCT  
 TGCAGCCATCATCCGCGGAGGCTCGACTCCACATAGTGC AACTCTTTCCGACGGCTACCACGGACCCGTCGAGCAT  
 CGTTTGTCTAGGGCCGCTATGGTTTTCTAGACCAAGTTCAACCTCGGTGCATCGTGGTATCTCATGCCGCTCGCCGTG  
 CGTCTGCGAGGGTTCGCTACATATCGACGCGCTAACCACCGCACTGGCAGCTCTGGAGCAGCGGCACGAGACTTTGCG  
 AACAACTTCGAAGAGCAGATGGTGTGGGCGTGCAGCTAATCCAGACGAGCCGCACTAAGGAGCTGAGGATAATTG  
 ATGTATCGGCCGGCGCGGATGACAGTAACTACATCCAGTTGCTACAGAATGAGCAGACCACTCCTTTCGATCTGGCG  
 TCTGAGCCAGGATGGAGGTTCTCGTTGCTACGATTGGGAAATGATGATCACATCCTCTCCATTGTATGCATCATAT  
 CATCTCCGACGGCTGGTCTATTGATATCTTATGTCAAGAGCTGGGAAAGTTCTATGCCATAGCACTCCGCGGCCAGG  
 ACCCGTTGTGCGAGATGAGCCGCTCCCGATTAGTACCAGCAGCTTTGCGGTGTGGCAAAAGCAAGCCGATCAAATA  
 GCCGAGCACGAACGGCAGCTCGAGTACTGGACCAAGCAACTTGCCGACAGCGCTCCTGCCGAACCTTCTAACCAGTCT  
 CCCCCGGCCGGCCGTAAGTGTCCGGAAGGCCGGTGTGCTCCAGCTCACCATCGAGGGCTCTGTGTACGAGAGACTCC  
 GAGCATCTGCCGAGCTCACCAAGTAACTCCTTTCGTGGTCTTACTCGCGGCATTCCGTGCAGCGCACTACCGTCTC  
 ACGGTTGCGGAAGATGCGACTGTTGGTACGCCGATCGCAACCCGAAACCGTCCAGAGTTGGAGAGCATGATTGGATT  
 CTTCCGTTAACACTCAGTGTATGCGGATTACCGTTGGAGATGACGATACATTCGAGGGGCTAGTTTCGAGACCCGGT  
 CAACAGCGACAGCCGCTTTGGCAACCAGGATGTCCCGTTGAGCGCGTCTGTTTACGCCCTTACCAGCTCGAGA  
 GACACATCGAGGAACCCACTGGTGCAGCTCATGTTTGCCTGCACTCTCAGGAAGATCTAGGCAAGATTACGCTAGA  
 CGATCTGGTAGGTGAGCCTATAACCAGCCGAGTACCAGCCGTTTTGACTTAGAGTTCCATCTATTTACGACAAACCG  
 GAAGGCTAGGGGGCAACGTAAGTCTTTGCGCAGACCTGTTGAGCCTGAGACTATCCACGGCATGGTGTCTGTGTTT  
 CAGGAAATCTTACGTCGTGGTCTAGAGGATCCCCAGACGCCAATCGTGTCCCTACCGCTTACCAGCGGCTGGCCGA  
 GCTTCGTAGCATGGCCCTCGTCGATATCGAGAGGACCGAGTACCCTCGCGAGTCCAGCGTGGTTGATGTCTTCCGCG  
 ACCAGGTGGCCGCTGTCTGACGCCACAGCTGTGAAGGACTCGTGCAGCAGCTGACCTACACTCAGCTGGACCGA  
 CAATCTGACGAGGTTGCTAGCTGGCTGCGCCAGCAGCGCATGGCTGCCGAGACACTGGTCCGGGTTGCTAGCGCCGCG  
 GTCGTGTGACAGATTGTTGCCTTTTTGGGCATCCTCAAAGCGAACCTAGCGTATCTCCCGCTCGACATCAATGTTT  
 CCGCAGCTCGTATAAAGGCAATCCTTTTCGAACGTACCAGGGGACAAACTGATTCTTCTCGGCGCCGACGTGGCTGTT  
 CCCGATATTCAGCTTCCCAACGTGGAGCTAGTACGTATCAAAAACACGCTGGGCAATCCTGATGCGTTTTGATTCTCT  
 TACTGTGCGAAAGCAACCTTCTGCAACAAGCTTAGCATACGTATCTTTACGTCAGGTTCAACGGGCGCCGAAAGG  
 GTGTTATGCGGAGCAGCATCTTAAAGCTTGTGAAGGAGAGTAAATGTGCTATCTAGGCTACCAGCTGACCAACCT  
 CGCATAGCGCATCTTTCAAGTATTGCCTTTGATGCCTCGACGTGGGAGATTTATTCCGCCCTCGACCGGTGGAAC  
 GGTGATCTGTATCGACTACTTTACAACCTTGGACAGCAAGGCTCTCGAGGCAGTGTTCGAACAAGAACAATCCGTTG  
 TGGCCACACTTCTCCCTGCTTTGCTCAAACAGTGCATAGCCAGCATACTGCTACGATTGCGGCCCTTAGAAGTACTC  
 TATACAGGTGGAGATCGGCTAGACAGTCTGTATGCGGCCGAGGCGGAGCGCTTGTCCAGAGTGCCGCTACAATGT  
 GTATGGCCCTACCGAAAATGCGGCCATCAGTACTATTTATGCCATTAAGGAGCATGATCTATTTGTTAATGGGGTTC  
 CTATCGGCCGTCGCATCAGCAACTCTGGTGCCTACATCTTGGACTCATCTCAACAGCTTATCTCTGTTGGTGTGATG  
 GGAGAGCTTGTGTCACCGGAGATGGGCTTGCCAGAGGGTACACCGATCCATCGCTGGACCTGAACCGCTTCGTCCA  
 GGTCTCTATTGACGGCCAGCTTGTGAGGGCGTATAGGACGGGCGACCGAGCACGATACCGGCCGAAGGATGGCCAGA  
 TCGAGTTCTTTGGACGTATGGACCAGCAGATCAAAATCCGAGGCCACCGCATCGAGCCGGCCGAGGTGGAGCATGCC  
 ATGCTCAGCCACGATGCGGTGAGCAGCAGCTGTCTGTCGTCGCAATGCCAGACGGTCAAGAACCAGGAAATGGTTGG  
 CTTTGTGCGCCCGGGGGCGACGAATCCGTCGAGCAGGACCGGCTACCGGTCAGGTGGAAGGTTGGGGAGACTACT  
 TTGAAACGAATACATATGTAGATATCGAAACCATTGGCCAGACTGCCATTGGCAGCGACTTCGTTGGCTGGACATCC  
 ATGTATGACAAGAGCAGATTGACAAGGCTGAGATGACAGGAGTGGCTCGATGATACTATGACAGACACTCCTCAACGG  
 TCAGGACCCTGTCCATGTATTTGAGATAGGACCCGGCACTGGTATGGTCTTATTCAATCTCGGCGACGGCCTACAGA  
 GCTACGTTGGCGTCAACCGTTCGAGGCTGCGGCTGCCTTTCGTCAACGATGCCATTAAGTCAATCCCTGCTCTCGCA  
 GGCAGGGCTGAGGTACATGTGCGCACGGCCACGGATGCAGGCCGCTTAGATGGGCTCCATCCAGACCTGGTCTGGT  
 CAATCTGTGGTCCAGTACTTCCCACGCCGAGTATTTTATCGAAGTCTCAACACGCTCACTCGACTCCAGGAG  
 TTAAGCGTCTATTCTTTGGTGACATACGGCCCACTCTCTTAAACAAGACTTCCCTCGCGGCCAGGGCTCTCCATGTG

CTAGGCGGAAAGGCGACTAAAGATGGAGTGCACGGAAGATGGCAGAAATCGAAGAGCGCGAAGAGGAGCTGCTAGT  
 CGACCCGGCCTATTTTCACGAGCCTAGCAGGCCGGCTCCCAGGTCAAATCCAGCATGTGCGAGATTCTACCCAAAAGAA  
 TGATAGCGACGAACGAGCTTAGCTCGTACCGGTATGCTGCTGTGCTGTCATGTGGGCGATCCCGACAAGCAAGTGCAG  
 GCTGTGCATGAGATCGATGCAGATGCTTGGATCGATTTCAAACCTCTCAGATGGACCGTCAGGCCCTACTCCGCCT  
 TCTACAGAGCTCGCCAGACGCCTTGACTGTCTCCGTGACCAACATCCCTTATAGCAAGACCATTGTAGAGCGACATG  
 TTAGGATGTGCTTGGATGAAAACGATGACGATGACGACGCAATGGATGAGGTGGCCTGGGTCTCTGCTGTCCACCAT  
 AGAGCGGATCGGTGCGCGTCGATGTCCGCAACCGACCTCCTGCAAGTAGGCGAAGAGACAGGCTTCAGCGTGGAGGT  
 CAGTTGGGCGCGACAGCAGTCCCAGAACGGCGCACTTGTATGCCGTCTTCCACCCTATACACCTGCCGCGAGTGGG  
 AGCGCGTTATGATTAAATTTCCGACTGACGACCAGACCCGGCCAGTAGGCTCTTTCACGAACCGGCCGCTACAGCGG  
 CTACAGGGCCGGCGGATCGAGGGACAGATCCGTGAAAGACTGCGGGCTCTCCTCCCACCGTACATGATCCCGACGCG  
 TATTGTGGTGTAGACCAGATGCCTGTCAACGCAAGCGGCAAGGTGACCGGCGAGAAGTTGCTCGAAGGGCCAGG  
 TTGCACCAATAAGGAATGTGGCGTCTTCTCGCGTGGCTCCACGGAACGAGATAGAAGTGTGTTGTGTGAGGAGTTT  
 GCCGATGTCTCGGCGTCGAGATCGGCATTACCGACAATTTCTTTTCATCTCGGGGGGCACTCCCTTATGGCCACCAA  
 GCTCGCTGCTCGCATCAGCCGCCGACTGGATAACCGCGTGTCCGTGAAAGGTATTTTCGACCACCTGTCTCGTTG  
 ATCTCGCAGCCATCATCCGCCGAGGCTCGACCCACATAACCCAATCCCCCAACAGCGTACCGCGGACCTTTCGAG  
 CAGTCGTTTGTCTAGGGACGCCTATGGTTCTTAGACCAGCTCAACCTCGATGCATCGTGGTACCTCATGCCGCTCGC  
 CGTGGCTCTGCGAGGGTTCGCTACACATCAATGCACTTGCCGTGCGACTGGCTACTGTGGAGCAGCGTCATGAGTCTT  
 TGCGAACAACATTCGAAGAGCAGCATGGTGTAGGCGTGCAGCTAATCCAGACGAGCCGCACTAAGGAGCTGAGGATA  
 ATTGATGTCACGGCCGGCGCAGATGATAGTAACTACATCCAGTCGCTGCAGATTGAGCAGACCACTCCTTTCGATCT  
 GCGCTGTAGCCAGGATGGAGGTCTCGTTACTACGATTGGGAGATGATGATCATATACTCTCCATTGTCTGTCACC  
 ACATCATCTCCGACGGTGGTCCATCGATATCCTTTGCCAAGAGTAGGGAAGTTCTATGCCGACGACTCCGCGCC  
 CAGGACCCGTTGTGCAAGTGACCCGCTCCCGATTACGATACCGCGACTTTGCCGTGTGGCAGAAGCAGGCCGAGCA  
 AGCAGTCGAGCACGAACGGCAGCTCGAGTACTGGACCAAGCAACTCGCTGACAGCGCTCCTGCCGAAGTTCTAACC  
 ATCTCCCCCGGCCGGCCGCTACTGTCCGGCAAGGCCGGTGTGCTCCAGCTACCATCGAGGGCGCTGTGTACGAGAGA  
 CTCCGAGCATTCTGCCGAGCTCACCAGGTAACATCCTTTCGTGGTCTTACTCGCGGCATTCCGTGCAGCGCACTACC  
 TCTCACGGGTGCGGAAGATGCGACTGTTGGTACGCCGATCGCCAACCGAAACCGTCCAGAGTTGGAGAGCATGATTG  
 GATTCTTCGTTAACACTCAGTGTATGCGGATTACCGTTGGAGATGACGATACATTCGAGGGGCTAGTTCTGCAGACC  
 CGGTCAACAGCGACAGCCGATTTGCCAACAGGATGTCCCGTTGAGCGCGTCTGTTTCAGCCCTCTTACCAGGCTC  
 GAGAGACACATCGAGGAACCCACTGGTGCAGCTCATGTTTGCCTGCACTCTCAGGAAGATCTAGGCAAGATTCAGC  
 TAGACGATCTGGTAGGTGAGCCTATAACCAGCCGAGTACCAGCCGTTTCGACTTAGAGTTCCACCTGTCCAGCAG  
 ACCGGAAGACTAGGGGGCAACGTACTCTTTGCCACAGACCTGTTTGGACCTGAGACTATCCACGGCATGGTGTCTGT  
 ATTCAGGAAATCTTACGTGCGGGTCTAGAGGATCCCCAGACCCCAATCGTGTCCCTGCCGCTTACCAGCGTTCG  
 CCGAGCTTCGTAGCATGGGTCTCGTTGATATCGAGAGCCGAGTACCTCGCGAGTCCAGCGCTTGTGATGCTCTTC  
 CGCGGCCAGGTGGCCATCTGTCTGACGCCACAGCTGTGATAGACTCGTTCGAGCAGCTGACTTATGCTGAGCTTGA  
 CCGACAATCCGACGAGGTTGCTAGCTGGCTGCGCCAGCAGCGTATGGCGGCCGAGACACTGATCGGGGTGCTGGCCC  
 CGCGGTGCTGTGACAGCGTTGTTGCCTTTTTGGGCATCCTCAAAGCAAATCTAGCGTATCTCCCGCTCGACGTCAAT  
 GTTCCAGCGGCTCGTATCGAAGCGATCCTGTCAAACGTACCAGGGCACAACTGGTTCTTCTCGGTGCCAATGTGGC  
 TGCCCCGATATTCAACTTCCGAACATAGAGCTGGTACGTATCAGCGACACGCTAGGCAACGATAATGTAGTTGACC  
 TCACGGACCCCGCTGTGCAGCCTTTGGCAACAAGCCTTGCATATGTCTATCTTACGCTCTGGGTGACTGGCATAACC  
 AAAGGCGTAATGTGCGAGCATCGTAATATCCTACGGCTTGTGAAGCAAATACCATCATTGCTAAGCTCCCAGGGG  
 AGTTCGTGTTGCGCACCTGACCAACATTGCCTTCGATGTATCAGTGTGGGAGGTTTTTGAACGCTATTGAATGGGG  
 GAACACTCGTTTGTATTAATACTATTTTACCACCTTGACAGCAAAGCTCTTGGCGATGTATTTGAACGAGAAAAGATC  
 CACATGGCCACACTTCCCCAGCCTTACTAAAACAGTGTCTAGTTGACAATCCTGCTATGCTTAGCTCCCTACATGT  
 TCTTTTGGCAGCCGAGACCGATTTCGATAGCCGCGATGCAATCGAAGCGAAAGCTCTGGTCGGAGCTGATGTCTATA  
 ACGCATAACGACCCACTGAGAACGGGATTTCTAGCACTTTATATAATGTGCGGGGAGAATGAGAAAACATCAAAATGGT  
 GTCCCTATCGGTGCGCTGTGAGGAATTCGGCGCTTACATTATGACTCACGCCAGCAACTCGTATCTTCTGGAGT  
 AGTGGGAGAGCTTGTGCTCACAGGAGACGGGCTTGGTAGAGGGTACACTGATCCATCGCAGGACCTAGACCCTTCG  
 TTCAGGTCTCCATCGACGGCCAGCTCGTGAGGGCATAACAGGACGGGCGACCGCGCGGATATCGGCCGAAGGATGGC  
 CAGATCGAGTCTTTTGGGCGCATGGACCGGCAGATCAAGATCCGAGGGCCACCGCATCGAGCCCGCGAGGTGGAGAA  
 TGCCATGCTCAGTCACGATGCGGTCCGCGATGCAGCTGTGGTGTGCTCCGATGCCGGAGGGCCAAGAGAGTCAAGAGC  
 CGGAAATGGTGGTTTTTGTTGCCGCACGGGGCGACGGATCTGTCAATCAGGCTTGGGTCAACCTAGACCAAACCTGGG  
 CACCGAAAACGTCGAGAAGAAAGATTGCGAGCGCAGACAGAGAGCGAGGTTCAATAGTCTGCAGGCATTGCTTCC  
 ACCATTTATGATCCCAGCGTATCGTGGTGTAGACCAGATGCCTGTCAACGCAAACGGCAAGGTGACCCGGCGAG  
 AACTTGTCTGATGGGCCAGGTTGCGCCAAAAGGAATGTATCGTCTTCTCGCGTGGCTCCACGCAACGAGGTAGAA  
 GTCGTGTTGTGCGAGGAATTTGTTGATGTCTCGGCGTCGAGATAGGCATCACTGATAACTTCTTCAATCTCGGAGG  
 ACATTCCTCATGGCCACCAAGCTCGCTGCTCGCATCAGCCGTCGACTGGATAACCCGTGTGTCCTCAAAGACGCT  
 TTGACCACCTTGTCTCGATCTTGCAGCCATCATCCCGCGAGGCTCGACCCACATAACCAACTCCCCCAACA  
 GCGTACCAGCGGACTGTGAGCAGTCTGTTGCCAGGGCCGCTATGGTTCTTAGACCAGTCAACCTCCGTTGCATC  
 GTGGTATCTCATGCCGCTCGCCATGCGTCTGCGAGGGTTCGCTACACATCAATGCGCTAACCGCCGCACTGGCTGCTC  
 TAGAGCAGCGGCACGAGACTTTGCGAACGACATTCGAAGAGCAGGATGGTGTAGGCGTGCAGCTAATCCAGACGAGC  
 CGCACTAAGGAGCTGAGGATAATTGATGTCTCGGCCGGCGCAGATGATAGTAACTACATCCAGTCGCTGCAGATTGA  
 GCAGACCACTCCATTCGATCTGGCATCTGAGCCAGGATGGAGGGTCTCGTTACTACGATTGGGAAATGATGATCACA  
 TCCTCTCCATTGTCTGATCATATCATCTCCGACGGCTGGTCCATCGATATCCTTTGCCAAGAGCTGGGAAAGTTC



GTTTTGGACCTATCGCTCTCGGCCGTTCTTTTTCAAACATAGCATCAGAGCTGCTTTCTTTTCAACAGCTTTACT  
 GAAACAGCGCCTTGATGAAATACCTTCGATAATCAGTGAGTTAGATATATTATTTCGCCGGCGGAGAGATAATGCGGC  
 CTCGAGATGCCCTCAACGCGGCACAATTAGTCCGGTACAATTTCTGTGCATGTTTACGGCCCCGACCGAAAACACAACC  
 TTCAGTACAGTTTACCGCTTCCAGTATGTGAGGATAGCGTCAATGGGGTTCCTATTGGTCATGCTATCAGCAACTC  
 TGGCGCTTACATTATGGACTCATGTCAACAGCTTGTCTCTGTCCGGTGTGATGGGAGAGCTTGTCTCACAGGAGACG  
 GGCTTGCCAGAGGGTATACCGATCCATCGCTGGACCTAGACCGCTTCGTCCAGGTTTCCATCGACGGCCAGCTCGTG  
 AGGGCATAACCGAACGGGCGACCGAGCAGATATCGGCCGAAGGATGGTCAGATCGAGTTCTTTGGGCGCATGGACCA  
 GCAGATCAAGATCCGAGGCCACCGCATCGAACCGGCCGAGGTGGAGCATGCCATGCTCAGCCACAATGCGGTCAGCG  
 GCGCAGCTGTCTGTCCGGATGCCAGACGGTCAAGAACCGGAAATGGTTGGCTTTGTTCGCCCCCGGGGCGACGAA  
 TCCGTCGAGCAGGACGCGGCTAGCGGTCACGTGGAAGGTTGGGGAGACTTCTTTGAAGCGAACACATATGTAGATAT  
 CAAGACCATTGGCCAGACTGCCATCGGCAGCGACTTTCGTTGGCTGGACATCCATGTATGACAAGAGCGAGATTGACA  
 AGGCTGAGATGCAGGAGTGGCTCGATGACACTATGCAGACACTCCTCAACGGTCAGGACCCTGTCCATGTATTTGAG  
 ATAGGCACCGGCCTGGTATGGTTCTATTCAATCTCGGCAGCGCCTACAGAGCTACATTGGCGTCGAACCGTCGAG  
 ATCCGCGGCTGCCTTCGTCAACGATGCCATTAAGTCAATCCCTGTCTCGCAGGCAGGGCTGAGGTACATGTCCGCA  
 CGGCCACGGATGCAGGCCGTCTAGATGGGCTCCATCCAGACCTGGTTCGTGGTCAATTCGTTGGTCCAGTACTTCCCC  
 ACGCCGGAGTATTTGATCGAAGTCGTGACGCTCTCACTCGACTACCAGGCGTCAAGCGTCTATTCTTTGGTGACAT  
 ACGACCCACTCTCTTAAACAAAGACTTCTTCGCGGCCAGGGCTTTACATATGCTAGGTAGAAAAGGCGACTAGAGATG  
 GAGTGGCAGATAAGATGGCAGAAATCGAAGTGCAGGAGAGGAGCTGCTAGTCGACCCGGCCTTTTTCACGAGCCTA  
 GCAGGCCGGCTCCAGGTCAAATCCAGCATGTGAGATTCTACCCAAAAGAATGATAGCGACGAACGAGCTTAGCTC  
 GTACAGGTATGCTGTCTGTGCATGTGGCGCATCCCGACAAGCAAGTGCAGGCTGTGCATGAGATGAGATGCAGTGC  
 CTTGGATCGATTTCAAACCTCTCAGATGGGACCGTACAGCCCTACTCCGCTTCTACAGAGCTCGCCAGACGCTTG  
 ACTGTCTCCGTCAGCAACATCCCTTATAGCAAGACCATTGTAGAGCGACATGTTAGGATGTCTGCTTGATGAAAACGA  
 TGACGATGACGACGCAATGGATGAGGTGGCTTCTGTCTGTCCACCATAGAGCGGATCGGTGCGCGTCGATGT  
 CCGCAACCGACCTCTGCAAGTAGGCGAAGAGACAGGCTTCAGCGTGGAGGTCAGTTGGGCGGACAGCAGTCCCAG  
 AACGGCGCACTTGATGCCGTCTTCCACCCTATACACCTGCCGCGAGTGGGCGAGCGGTTATGATTAATTCGGAC  
 TGACGACCAGACCCGGCCAGTAGGCTCTTTCACGAACCGGCCGTACAGCGGCTACAGGGCCGGCGGATCGAGGGAC  
 AGATCCGTGAAAGACTGCGGGCTCTCTCCACCGTACATGATCCCGACGCGTATTGTGGTGTAGACCAGATGCCT  
 GTCAACGCAAACGGCAAGGTCGACCGGCGAGAATTGCTCGAAGGGCCAGGTTGCACCAATAAGGAATGTGGCGTC  
 TTCTCACGTGGCTCCACGCAACGAGATAGAAGTCGTGTTGTGTGAGGAGTTTGCCGATGTCTTCGGCGTCGAGGTCG  
 GCATTACCGACAATTTCTTTTCATCTCGGGGGGCACTCGCTCTTGGCCACGAAGCTTGAGGGCAACTCAGCCGCCGG  
 CTGGATGTCCGAGTGTCCGTCAAAGATATATTGACCCAGCCGGTGCCTCCGCGGACCTCGCGAACAAGATTAGATTAA  
 TCAATTGCGGGGCCACACAGCAAGCAATGGAGTTTACCAACACCCAGAAAGCGCTCCATTCCATCTACTTCTTTTG  
 AAGATCCGCGGACATTTGTGCTCCGCGAAATCTCCCGCACTTGAGGACTGCCATGTTAGATACTTAGACGCTAC  
 CCTGCAACAATGACACAAAAGACTTTCTCCTCAAGATCCAGTACGGGTCACCCACGCACTCCGGCGCTCTTTTTCAT  
 AGACTTCCACCTAACTCGGATTGTGCTCGGCTAGTTAAACCTGCACGGCTCTAGTCCAACATTACGACATCTTTA  
 GGACCGTGTCTTTCATGGCGGCCGGTGCCTTCTACCAGGTAGTCTTGGAAACATCTTGACGTGCCGATTGAGGTTGTC  
 GAAATCGACGAAGATATCACCAGTGCACCCGCTCCATCATTGGGTATGGATGGACAACAGTCTCTTCGTTTAGGACA  
 ATCATTGCTACGCATCGCCATTCTGAAGAATCGGGAATCGACGGTGCAGTAGTGCTTTCGAATGTCTCATGATTGT  
 ATGATGGCTTGAGTTTCGAGCACATTGTGCATTCACTTCACTCTATACAACGGCAATCAGCTTCCAACACCTCCC  
 AAATTTGCTCAATATGTTCAACATATGATTAACAGCCGCAAAGACGGTTACGAGTTCTGGCGCTCTGTTCTGCAGAA  
 TTCTTCGATGACAGTCGTCCGTTAGTGTAGCCATGGCCGTCACCAAAAACCAGGAGCTGACGGTGCATGGTTTTGTGG  
 AAAAGCTCATTAACGCTCCTTTTCAGGCCAATATAGGCGGCATCACACAGGCAACAGTGTTTACTACTGCCTGCGCT  
 CTAATGCTTGCACAAGAGACCAGATCAAGGGATGTCTTTTTTGGTTCGAGTGCCTGTCTGGACGCCAGTGTCTGCCTGT  
 CGGTTGCCAACATATCGTTGGCCCTTGCAATAATAATGTGCTGTGCGGAGTTTCCATAGATGGGGCCGCCACTCCGA  
 GAGAATTACTACAGGAGTGCAGAACAGTACTATAACAGCTTGCCTTTTGGAGACTTAGGATTCGATGAGTGCAGTGA  
 GAAAATGCACAGACTGGCCAGACAGACTATTAACACGTTGTTGTCACGGTATATCAAAAATTTAACATTCATCC  
 TGAAAGTCATATCCAAGACCAGCGGATTTCGGCTGGAGACTTTAGCACGAGATTCTCGAGCAGGAAAATCCAGCGAGT  
 GCGATACTGCTCTGAGCAAGGGAACCTGGATGAGACACCGATTACGACGCTGGATATAGCAGGAGTTCTGAGCCC  
 GACGGACTTCGACTGCGGGTGTCTATAGTTGCCAACCGACGAATTTGTGAAGAAGAGACGGTGGACCATATGATCAA  
 AGAGCTTTGTGAGAGAATTCTGAGCTTGAACCTAGCTTTGCAAGATCTATCCACAAGAGAGATGGAAGGTATTTGA

>Orf3\_translation

MASTNNKLSVRAATASFTTGVANHNKNNNNNNNRNILSMQASRHLGLDQSMIENILPCTPFQRDVMHAAKDRRRA  
 VGHVVYEIPKNVDIERLAAWKEVVRQTPALRTECMFTLESGDHLQVILSDSFKWVYLSGLDMNEAVAEIEEEEAAVT  
 RSQCNRYAVFENPNTKQRLLIWTFSHALVDTVFOERILVKVLKVYHGGEIQHSLGTELIVNSLAKDPERIARFWQH  
 FDGLIASAFPALPSLTPRPDAHAEHRI SYPGLAQQVWNNTIICQAALAVLLARYTHTSEALFVGVVVERPFLNGL  
 EQPLDGPTRTIVPTRVVC DPRQSLDLMQAI SAQDMAVREFEQAGLHS IRRAGDFGSAACGFETVLLVLTANNVPQAH  
 SSRHRADTKSKDFIPYTDRAALLDCQADTSALLVARYDPSLQTLDDRQMARFLKQLGYLIQQFQSHVVKLP IRELDV  
 VTQEDQAEIQKWN SGLLRASELCIHDVIEERAADTPYEPAVLAWDGGWTYAELDRLSRLAGYIQTHDLELGRV VPL  
 CFEKSKWIVAAMLAVLKTGRAFTLIDPAYPAARIAKICEQTSATVALASKVQYEAICTVVPQCI AVDDDELFO SLPHD  
 EDHFRTIVKPODLAYILFTSGSTGEPKGS MIEHRGFTSCCLEFGPRMGINKHTRSLOFASYAFGACLVEILATLMHG  
 GCVCIPSENDRMNDVPGFINRVGVN WAVFTPSFIGAIQPESVLGLQTLV LGGEPMLAEMRDNWASKVQLIYVYQSE

SSSVCSVTEVKQDTAELNNGGAVGARFWITDPIINPDRLAPIGVSVELVIESPGIARGYVVAPPKQKSPFLVTAPAW  
 YPASQQLGSVRFYRTGDLVRYRSDGTVVYLGRRDSQVKIRGQORVELGDVESHRLRQQLPSHVMPVVEAVRRSNASNST  
 TLLAFLIGPFYDGEDTPHTTSAMDVCILETSAAKRIKIKLQEVIPQHCIPSHFIRMKHLPTTTTGTDRRRRLRSIGT  
 TLLDEMNVNGRSWPEERFAPTASAEVTLQQLWFRSLNIDPSSNSHGASFFELGGDSIAAIKLVNMARSLGIALEIAD  
 ILQNP TLTGLAATIOGLSTPHNPIAQTRYHGPVEQSFAQGRWLWFLDQFNLGASWYLMPLAVRLRGLSHINALAVALA  
 ALEQRHETLRTTFOEQDGVGVQVIQTSRTEELRVIDVSAGADDSRYIQLLQNEQTTFFDLASEPGWRVSLRLGDDD  
 HILSIVMHHIISDGWSVDILCRELDQFYAATLRGQDPLSQVSPPLIQYRDFAVWQKQDDQVAEHERQLEYWTKQLTD  
 SSPAEFLTDLPRPAVLSSQAGVVQLTIEGLVYENLRAFCAHQVTSFAVLLAAFRAAHYRLTGAEDATVGTPIANRN  
 RPELENMIGFFVNTQCMRIIVGEDDTFEGLVQRTRSTTAAAFANQDVPFERIVSCLLPGSRDTSRNPLVQLMFALHS  
 QQDLGKIQLKGLAGELLPSVATTRFDVEFHFLQEAERLVGRVLFSTDLFEATTIDGMVAVFQETLRRGLEEPQAPIV  
 SLPLTDGVAKLRNMGVLVDIDRIEYPRESSVVDVFRDQVAACPNAAAVTDSSQQLTYAQLDQKSDEVASWLRQORMAA  
 ETLVGVLAPRSCQTVVAFGLILKANLAYLPLDINVPAARIKTISSLPGRKLVLLGADVAAPDVQLPDMELVRIDDT  
 LGNPGAVDSLTVGKQPSATSLAYVIFTSGSTGVPKGMVPHRSLVNVVTPORPAYGAVAHMTNLAFDPSIFEICMALL  
 NGYKLCVICTMTVLDGVHLYIFKQEDIRVAMITPALLTRVLDQAPQAVGQLEALYVLGDRFPAEDAARKARELVRTA  
 VFNGYGPSENSILTTSFHITPGVMCTNGVVPGRVINNSGVYVMDPQQLVSLGVMGELVVTDGDLARGYTDPPDRDQD  
 RFVQIIVDDKPKAFRTGDRVRYRPTDGQLEFYGRMDNQQVGRHRVPEAIEIRVLRHNAVKDAVVLLKRHGDTQQ  
 DVELVGFITVVEDQSMIRANQKLTDHARESAQLEEEEDDEVKMAQLDPNVEANLRSVLQATLPSYMPVPSRIIVLDQM  
 PLNTNGKVDRLARLTLASPTNRESRTVVAPRNEIEVSLCEEFAADV LGVEISITDNFFNLGGHSLMATKLAARISR  
 RLDTRVSVKDLFDNPVLDLAAIIRRGSTPHNSIPTTYHGPVEQSFAQGRWLWFLDQFNLGASWYLMPLAVRLRGLS  
 HIDALAVALATLEQRHETMRTTFOEQDGVGVQVQTSRTEELRVIDVSAGADDSYIQLLQNEQTTFFDLASEPGWR  
 VSLRLGSLHIDALAVALATLEQRHETMRTTFOEQDGVGVQVQTSRTEELRVIDVSAGADDSYIQLLQNEQTTFFDLASEPGWR  
 LEYWTKQLTDSAPAELLKDLPRPAILSGKAGVVQLTIEGSVYERLRAFCAHQVTSFVLLAVFRAAHYRLTGAEDA  
 TVGTPIANRN RPELENMIGSFVNTQCMRITIGDGTTFEGLVQRTRSTATAAFANQDVPFERVVSALLPGSRDISRNP  
 LVQLMFAVHSQEDLGKIQLSGLVGEHMIPTVSTRFDVEFHFLQEVGRMSGSVLFDLFESTTIRGMVSVFQEI LRR  
 GLEEPQTPIVSLPLTDDLAELRSMGLLDIERTGYPRESSVVDVAFREQAGACPGATAVKDSSQQLTYTQLDRQSDEVA  
 SWLRQORMAAETLVGVLAPRSCQTVVAFGLILKANLAYLPLDINVPAARIKAILSMVSGRKLVLGADAAAPDVQLP  
 DVELVRIDDMLRNP GAVDSDSLTVGKQPSATSLAYVIFTSGSTGVPKGMVAEHRSILRLVKESNVVSRPAPRIAH  
 LSSIAFDASTWEIYSALLNGGTVICIDYFTALDSKALEAVFEQEQIRVATLLPALLKQCLASIPATIGALEVLYTGG  
 DRLDSDRDATEARALVQSAVYNVYGPTENAAISTIIYAEHDLFVNGVPIGRAISNSGAYILDSSQQLVSVGVMGELV  
 VTGDGLARGYTDPSLDLNRFFVQVSDIGQLVRAVRTGDRARYRPKDGQIEFFGRMDQQIKIRGHRIEPAEVEHAML SH  
 NAVSDAAVVVRMPEGRERQEPVMGVFAARSDIESINHAWVSQDGLEHRRSREKGFAAQTENEIQIRLQTLPPYMIPT  
 TRIVVDQMPVNAVNGKVDRRALARLTLASPTDQESRTVVAPRNEIEVSLCEEFAADV LGVEIGINDNFFHLGGHSLMA  
 TKLAARISRLDTRVSVKDLFDNPVLDLAAIISRTSPHSAIILPTAYHGPVEQSFAQGRWLWFLDQFNLGASWYLMPL  
 LAVRLRGLSHIDALAVALATLEQRHETLRTTFFEEHDGIGVQVIQTSRTEELRVIDVSAGADDSYIQLLQNEQTTFF  
 DLASEPGWRVSLRLRFGDDDHILSIVMHHIISDGWSVDILCRELSQFYAATLRGQDPLSQVSPPLIQYRDFAVWQKQD  
 DQVAEHERQLEYWTKQLTDSAPAELLNDLPRPAILSGKAGVVQLTIEGSVYERLRAFCAHQVTSFVLLAVFRAAH  
 YRLTGAEDATVGTPIANRN RPELESVIGFFVNTQCMRITIGDGTTFEGLVQRTRSTATAAFANQDVPFERVVSALLP  
 GSRDTSRNPLVQLMFAVHSQEDLGKIQLSGLVGEHMIPTVSTRFDVEFHFLQEVGRMSGSVLFDLFESTTIRGMV  
 SVFQEI LRRGLEEPQTPIVSLPLTDGVAKLRSMGLVDIDRTEYPRESSVVDVFRDQVAACPDATAVKDSSQQLTYTQ  
 LDRQSDEVASWLRQORMAAETLVGVLAPRSCQTVVAFGLILKANLAYLPLDVNVPAARIKTISSNVPGHKLVLIGVD  
 VAAPDLQLPVEEVVSI GDTLGDSPVDFPVASLQPTTSLAYVIFTSGSTGVPKGMVAEHRSILRLVKESNVVSRP  
 RAPRIAH LSSIAFDASTWEIYSALLNGGTVICIDYFTTLDNSNALEAVFEQEQIRVATLLPALLKQCLASIPATIGAL  
 EVLYTGGDRLDSDRDATEARALVQSAVYNVYGPTENAAISTIIYAEHDLFVNGVPIGRAISNSGAYILDSSQQLVSV  
 GVMGELVVTGDGLARGYTDPSLDLNRFFVQVSDIGQLVRAVRTGDRARYRPKDGQIEFFGRMDQQIKIRGHRIEPAEVE  
 EHAML SHNAVSDAAVVVRMPDQGEQERQEPVMGVFAARSDIESVEQDAATGHVEGWGDQYFETNTYVDIETIGQTAI  
 GSDVFGWTSMYDKSEIDKAEMQEWLDDTMQTLNLNGQDPVHVFEIGTGTGMVLFNLGDGLQSYVGVPEPSRAAAAFVND  
 AIKSI PALAGRAEVHVGATDAGRLDGLHPDLVVVNSVVQYFPTPEYLI EVVDALTRLPGVKRLLFFGDIRPHSLNKD  
 FLAARALHVLGGKATKDGVRKMTIEEEREELLVDPAFFTSLAGRLPGQIQHVEILPKRMIA TNELSSRYAAVVH  
 VGDPDKQMQAVHEIDADAWIDFKTSQMDRQALLRLLQSSPDALTVSVSNIPYSKTI VERHVRMSLDENDDDDDALDR  
 IAWVSAVHHRADRCASMSAADLLQVGEETGFRVEVSWARQOSONGALDAVFHHYTPAASKQIRIMIRFPTDDQTRPVG  
 SFTNRPLQRLQGRRIEQIRERLQALLPPYMIPTRIIVLDQMPVNASGKIDRRELTRRAQVAPKRN VASSRVAPRNE  
 IEVVLCEEFAEVLGVEVGITDNFFHLGGHSLMATRVASRINRRLNALITVRDVFVRPVVADLADLLCQLFGATTYVP  
 IPRTQVDGPVEQSFAQGRWLWFLDRLYPQSTWYLMFPATMRGPHLDALSAAALQALEERHEPLRTTFFEHRDGVNLQV  
 VHPFAPKKNPIHVPEGSWKILTQALRQEH TTPFNLEIEPGWRTSIFRLGEEDHVLSIMMHHIISDGWSVDILQREL  
 AAFYAATIRAQDPLSLARPLPIQYRDFAVWQKQEAQNEHQHQLDYWKQQLDGSQSAELLYDKPRPAVLSGKAEVHE  
 IVINGALYRNLOQFCKSHQVTPFAVLLAAFRATHYRLTGVEDATIGTPIANRN RQLEDLIGFFVNLICIRIHVQE  
 TFEALVRQNTTAAASANQDVPFEMLV AELRPGARDLSRNPLVQMTFALHSQRNIGYLRDLGLETQPLGVCATSRF  
 DLEFH FYEEDDRMGAVIFSDELFDPMHSIHMSVFFEVLTGRGLDPTARIATMPLTDGLSMLTDMGLTEI EPTDYP  
 RDSSVPVLFROQVAICGEAVAVKDGSTQLTYAELNLQSDQVACWLAQRGFAPETMIGVLAPRSCETVVVFLGILKAN  
 LAYLPLDVNVPPRRLESILSAVHGHKLVLLGADVAPPTTGLSDIEFLAITKIQQQVVGWQETAALP IPSPTSLAY  
 VMFTSGSTGQPKGMIEHRGIVRLVRETNVISQTEAAVPAHVSNLAFDAATWEIYAPLLNGGTVVCIDYMTVLDAA  
 ALGQVLAGEKVRAALFTPALLKQCLRDAPAALAGLTLLASGDRLDSRDATEARKLLNGDLINSCGHTE NTTFSTIY  
 RVPQNESSVNGVPIGSAISHSGVLVMDSSQQLVPLGVMGELILTDGDLARGYTDPALDRDRFITVTVNGGSVKAYRT

GDRVRYRPVVDGQLEFFGRMDHQVKIRGHRVELAEVEHALLRNSSI SDAVALVREPDGEEAALVSFVTILSGQTLFQF  
 KQGEESGEGGQVEAWADLFNSNTYADINTIDTAKLGRDFMGWTSMYDGEPI DRGEMNEWLHDTITAIQSGGQPANVF  
 EIGTGTGMILFNLSDGLQSYVGLDPSASAATVWTKMSKAKPGLTEKIDVRVGTAAADVQQLGQVNSPELVVINSVVQY  
 FPSAEYLS'TTVERLLRLNLDLRFVGDVRSYPLYRDFGATKGLHLV GASATKETLCRQLVGMEEAEELLDVPAFFT  
 SLASRLPDLVEHVEILPKMKKATNELSCYRFAAVIHARRKGGQARRILEVAEDAWIDFQAHQLDRVGLVGLLQNSPA  
 SSIVAVSHIPIYSKTVLERDLVNSLDSEAAEGPTEVTGDWLMSIRDAAHACPALSAFDIEELAQEAGFRVEVSWARQR  
 SLRGGMDAVFHRFQQRPLFRFPTDYQGC SKDSFTNRPLRQETQKVEAYLRAQLLVTLPSYMI PARISVLDEMPVN  
 ANGKVDRRALAQMAVG PATIR SARTIVPPRSDAERALCEEF AHLLSVEVGITDNFFHLGGHSLMATRLAARI SRRLD  
 TRVSVKDVFDHPVLVDLAAI IRRGSTPHNPI PATTYRGPVEQSFAQGRWFLDQFNLGASWYLMPLAVRLRGLSHIN  
 ALAIALAALEQRHETLRTTFFEEHDG VGVQLIQTSRTKELRI IDASAGADDSNYIQSLHNEQ'TTFFDLASEPGWRVSL  
 LRLGGDDHILSIVMHHIISDGWSVDILCRELQGFYAAALRGDPLSQMSPLPIQYRDFAVWQKQDDQVAEHERQLEY  
 WIKQLADSAPAELLNDLPRPAVLSGKAGVVQLTIEGSVYERLRAF CRAHQVTSFVVLAAAFRAAHYRLTGAEDATVG  
 TPIANRRRPELESMIGFFVNTQCMRITVGDDDSFEGLVLQTRSTATAAFANQDVPFERVVSALLPGSRDTSRNPLVQ  
 LMFALHSQODLGSIQLOGLAGELLPSVATTRFDVEFHFLFQEAERLVGSVLFSTDLFESNTIHG VVSVFQEVLRGLE  
 DPQTPIVSLPLTDGLAELRSMGLVDIERTEY PRESSVVDVFRDQVAACPDATAVIDSSQQLTYAQLDRKSDEVAGWL  
 RQORMAAETLIAVLAPRSCQTVVAF LGILKANLAYLPLDVNI PAARIKTILSNLPGRKLVLLGADVAAPDVQLPDVE  
 LVRIDDTLGNPGAVDSLTDGKQPSATSLAYVIFTSGSTGVPKGIMVPHRSLVNVVVTQRPAYGAVAHMTNLAFDPSIF  
 EICMALLNGYKLVCIDTMTVLDAVHLTHIFKQEDIRVAMITPALLTRVLDQAPQAVGQLEALYVLGDRFPAEDAACA  
 RELVRTAVFNGYGPSENSILTTSFHITPGVMCTNGVVPVGRVINNSGVYVMDPQORLVSLGVMGELVVTGDGLARGYT  
 DDPDRDQDFVQIIVDDKPMKAFRTGDRVRYRPTDGLEAFYGRMDNVKVRGHRVEPAEIERVLRHNAVKDYAVVLLK  
 RHGDIQQDVELVGFITVVENQSMIRANQKLDHVRESAQLEEEEDDEAKMAQLDPNVEANLRSVLQATLPSYMPVSR I  
 IVLDQMP LNTNGKVDRRALARLTL SATTDRSRTVVAPRNEIEVSLCEEFADVLGVEIGITDNFFHLGGHSLMATKL  
 AARISRRLDTRVSVKDVFDHPVLVDLAAI IRRGSTPHSAIFPTAYHGPVEQSFAQGRWFLDQFNLGASWYLMPLAV  
 RLRGSLHIDALTTALAALAEQRHETLRTTFFEEHDG VGVQLIQTSRTKELRI IDVSAGADDSNYIQLLQNEQ'TTFFDLA  
 SEPGWRVSLRLGNDHILSIVMHHIISDGWSIDILCQELGKFYAIALRGDPLSQMSPLPIQYRDFAVWQKQADQI  
 AEHERQLEYWTKQLADSAPAELLTDLPRPAVLSGKAGVVQLTIEGSVYERLRAF CRAHQVTSFVVLAAAFRAAHYRL  
 TGAEDATVGTPIANRRRPELESMIGFFVNTQCMRITVGDDDTFEGLVLQTRSTATAAFANQDVPFERVVSALLPGSR  
 DTSRNPLVQLMFALHSQEDLGKIQLDL VGEPIPAAVTSRFDLEFHLFQQTGRLGGNVLFAADLFEPETIHGMVSVF  
 QEILRRGLEDPQTPIVSLPLTDGLAELRSMGLVDIERTEY PRESSVVDVFRDQVAACPDATAVKDSSQQLTYTQQLDR  
 QSDEVASWLRQORMAAETLVGVLAPRSCQTVVAF LGILKANLAYLPLDINVPAARIKAILSNVPGDKLILLGADVAV  
 PDIQLPNVELVRIKNTLGNPDADFSLTVGKQPSATSLAYVIFTSGSTGVPKGMVAEHRSLRLVKESNVVSR LPRAP  
 RIAHLSSIAFDASTWEIYSALLTG GTVICIDYFTTLD SKALEHDFEQE QIRVATLLPALLKQCIASIPATIAALEVL  
 YTGDRRLSDAAEARALVQSAVYNYGPTENAAI STIYAIKEHDLFVNGVPIGRAISNGGAYILDSQQILSVGM  
 GELVVTGDGLARGYTDPSLDLNRVQVSDIGQLVRA YRTGDRARYRPKDGQIEFFGRMDQOIKIRGHRIEPAEVEHA  
 MLSHDAVSDAAVVVRMPDGQEPPEMVG FVAARGDESVEQDAATGHVEGWGDYFETNTYVDIETIGQTAIGSDFVGWTS  
 MYDKSEIDKAEMQEWLDDTMQ'TLLNGQDPVHVFEIGTGTGMVLFNLGDGLQSYVGVPEPSRSAAAFVNDAIKSI PALA  
 GRAEVHVGATDAGRLDGLHPDLVVVNSVVQYFPTPEYFIEVVNTLTRLPGVKRLFFGDIRPHSLNKDFLAARALHV  
 LGGKATKDGVRKMAEIEEREELLVDPAYFTSLAGRLPGQIQHVEILPKRMIA TNELSSYRYAAVVHVGD PKQVQ  
 AVHEIDADAWIDFKTSQMDRQALLRLLQSSPDALTVSVSNIPYSKTI VERHVRMSLDENDDDDAMDEVAVVSAVHH  
 RADRCASMSATDLLQVGEETGFSVEVSWARQOSQNGALDAVFHHYTPAASGQRMVKFPTDDQTRPVGSFTNRPLQR  
 LQGRRIEQIRERLRALLPPYMIPTRI VVLDQMPVNASGKVDRRELARRAQVAPIRNVASSRVAPRNEIEVVLC EEF  
 ADVLGVEIGITDNFFHLGGHSLMATKLAARISRRLDTRVSVKGFIDHPVLVDLAAI IRRGSTPHNPIPTAYRGPFE  
 QSFAQGRWFLDQNLNDASWYLMPLAVRLRGLSHINALAVALATVEQRHESLRTTFFEEHDG VGVQLIQTSRTKELRI  
 IDVTAGADDSNYIQSLQIEQ'TTFFDLASEPGWRVSLRLGDDHILSIVMHHIISDGWSIDILCQELGKFYAAALRG  
 QDPLSQVTPLP IQYRDFAVWQKQAEQAVEHERQLEYWTKQLADSAPAELLTDLPRPAVLSGKAGVVQLTIEGAVYER  
 LRAF CRAHQVTSFVVLAAAFRAAHYRLTGAEDATVGTPIANRRRPELESMIGFFVNTQCMRITVGDDDTFEGLVLQ  
 RSTATAAFANQDVPFERVVSALLPGSRDTSRNPLVQLMFALHSQEDLGKIQLDL VGEPIPAAVTSRFDLEFHL SQ  
 TGRLGGNVLFATDLFEPETIHGMVSVFQEI LRRGLEDPQTPIVSLPLTDGLAELRSMGLVDIERTEY PRESSVVDV  
 RGQVAICPDATAVIDSSQQLTYAELDRQSDEVASWLRQORMAAETLIGVLAPRSCQTVVAF LGILKANLAYLPLDVN  
 VPAARIEAILSNVPGHKLVL LGANVAAPDIQLPNIELVRI SDTLGNDNVVDLTDPAVQPLATSLAYVIFTSGSTGIP  
 KGVMCEHRNIRLVKQNTIIAKLPGAVRVAHLTNI AFDVSVWEVFATLLNGGTLVCINYFTTLD SKALADVFEREKI  
 HMATLPPALLKQCLVDNPA MLSSLHVLLAAGDRFDSRDAIEAKALVGADVYNAYGPTENGILSTLYNVGENEKHANG  
 VPIGRAVRNSGAYIMDSRQQLVSSGVV GELVVTGDGLARGYTDPSQDLDRFVQVSDIGQLVRA YRTGDRARYRPKDG  
 QIEFFGRMDRQIKIRGHRIEPAEVENAMLSHDAVRDAAVVVRMPEGQESQEPPEMVG FVAARGDGSVNQAWVNDLQ TG  
 HRKRREERFAAQTESEVRISLQALLPPFMIPTRI VVLDQMPV NANGKVD RRELARWAQVAPKRNVS SRVAPRNEVE  
 VVLC EEFVDVLGVEIGITDNFFNLGGHSLMATKLAARISRRLDTRVSVKDVFDHPVLVDLAAI IRRGSTPHNPIPT  
 AYRGPVEQSFAQGRWFLDQNLGASWYLMPLAMRLRGLSHINALTAALAALEQRHETLRTTFFEQDGVGVQLIQTS  
 RTKELRI IDVSAGADDSNYIQSLQIEQ'TTFFDLASEPGWRVSLRLGNDHILSIVMHHIISDGWSIDILCQELGKF  
 YAVALRGDPLSQMSPLPIQYRDFAVWQKQDDQVAEHERQLEYWTKQLADSAPAELLTDQPRPAVLSGKAGVVQLT I  
 DGSVYERLRAF CRAHQVTSFVVLAAAFRAAHYRWTGAEDATVGTPIANRRRPELESMIGFFVNTQCMRITVEDDDTF  
 ERLVLQTRSTATAAFANQDVPFERVVSALLPGSRDTSRNPLVQLMFALHSQEDLGKIQLDL VGEPIPAAVTSRFDL  
 EFHLSQQTGRLGGNVLFATDLFEPETIHGMVSVFQEI LRRGLEDPQTPIVSLPLTDGLAELRSMGLVDIERTEYPRE  
 SSVVDVFRDQVTACPDATAVIDSSQQLTYAELDRQSDEVANWLRQORMAAETLIGVLALRSCQTVVAF FGLKANLA

YLPLDVNIPAARIKTIILSNLPGRKLVLLGADVAAPDVQLPDVELVRIDDTLGNPGAVDSLTVGKQPSATSLAYVIFT  
 SGSTGVPKGIIMVPHRSLVNVVTQRPAYGAVAHMTNLAFDPSIFEICMALLNGYKLVCIDTMTVLDVAVHLTHIFKQED  
 VRVAMITPALLTRVLDQAPQAVGQLEALYVLGDRFPAEDAARKARELVRTAVFNGYGPSENSILTTSFHITPGVMCTN  
 GVPVGRVINNSGVYVMDPQORLVSLGVMGELVVTGDGLARGYTDPRDQDRFVQIIVDDKPKMAFRTGDRVRYRPTD  
 GQLEFYGRMDNQVKVRGHRVEPAEVERVLVRHSAVKDVVLLKRDGDTQODVELVGFITVVEDQSMIRANQMSTDHA  
 RESAQLEEDDEVKMAQLDPNVEANLRSVLQATLPSYMPVPSRIIVLDQOMPLNTNGKVDRRALARLTLGATTDQKSRT  
 VVAPRNEIEVSLCEEFADVLGVEIGITDNFFNLGGHSLMATKLAARISRRLDTRVSVKDVFDHPVLVDLAAIIRRS  
 TPHNPIPATAYRGPVEQSFAGRLWFLDQFNLGASWYLMPLAMRLRGSLSHINALTAALAALAEQRHETLRTTFEEHDG  
 VGVQLIQTSRTELRIIDVSAGADDSNYIQSLQIEQTTFFDLASEPGWRVSLLRGNDHILSIVMHHIISDGWSID  
 ILCQELGKFYAIALRGQDPLSQESPLPIQYRDFAVWQKDDQVAEHERQLEYWTKQLADSAPAELLTDLPRPAVLSG  
 KAGVVQLTIEGAVYERLRAFCAHQVTSFVVLLAAAFRAAHYRLTGAEDATVGTPIANRNHPELESIMGFFVNTQCMR  
 ITVEDDDTFERLVLQTRSTATAAFANQDVPFERVVSALLPGSRDTSRNPVQLMFALHSQEDLGKIQLEDLVGLMP  
 TTVSTRFDLEFHLFQOTRRLEGNVLFADLFEPETIHGMVSVFQEIILRRGLEDPQTPIVSLPLTDGLAELRSMGLVD  
 IERTEYPRESSVVDVFRDQVAICPDATAVIDSSQOLTYADLDRQSDEVASWLRQORMPAETLIGVLAPRSCQTVVAF  
 LGILKANLAYLPLDVNVPVARIIEAILSNVPGHKLILLGANVAAPDIQLPNVELVRIISDTLGNNDNVFDFDTPALRPAA  
 MSLAYVMFTSGSTGRPKGVMVEHRSIVRLVRETNLISQAGAAVSVAHQANLAFDAATWEIYTPLLNGGTVVVICIDYMT  
 VLDPIALGRSFSKHSIRAAFFSTALLKQRLDEIPSIISELDILFAGGEIMRPRDALNAAQLVRYNFCHVYGPTENTT  
 FSTVYRFPVCEDSVNGVPIGHASNSGAYIMDSCQQLVSVGVMGELVVTGDGLARGYTDPSLDLDRFVQVSIIDGQLV  
 RAYRTGDRARYRPKDGQIEFFGRMDQOIKIRGHRIEPAEVEHAMLSHNAVSGAAVVVRMPDQGEPEMVGFAARGDE  
 SVEQAASGHVEGWGDFFEANTYVDIKTIGQTAIGSDFFVGTSMYDKSEIDKAEMQEWLDDTMQTLNLNGQDPVHVFE  
 IGTGTGMVLFNLGDGLQSYIGVEPSRSAAAFVNDAIKSI PALAGRAEVHVGTATDAGRDLGHPDLVVVNSVVQYFP  
 TPEYLIIEVVDALTRLPGVKRLFFGDIRPHSLNKDFLAARALHMLGRKATRDGVRHKMAEIEVREEELLVDPAFFTSL  
 AGRPLPGQIQHVEILPKRMIAATNELSSYRYAAVVHVGDPAKQVQAVHEIDADAWIDFKTSQMDRQALLRLLQSSPDAL  
 TVSVSNIPYSKTIVERHVRMSLDENDDDDAMDEVAWVSAVHHRADRCASMSATDLLQVGEETGFSVEVSWARQSQ  
 NGALDAVFHHYTPAASGQRMKIFPTDDQTRPVGSFTNRPLQRLQGRRIEQIRERLRALLPPYMIPTRIIVVLDQMP  
 VNANGKVDRELARQAQVAPIRNVASSHVAPRNEIEVVLCEEFADVLGVEVGITDNFFHLGGHSLLATKLAGQLSRR  
 LDVRSVKDIFDQVPADLANKIQINQLRAHTASNGVLPTEPESAPFHLLPFEDPRTFVLREISPRLEDCHGRILDVY  
 PATMTQKTFQLQDPVTGHPRTPALFFIDFPNSDCARLVKTCALVQHYDIFRTVFFMAAGAFYQVVLEHLDVPIEVV  
 EIDEDITSATRPSLGMGQQSLRLGQSLLRIAILKNRESTVRVVLRMHALYDGLSFEHIVHSLHTLYNGNQLPTPP  
 KFAQYVQHMINSRKDGVEYFWRVSVLQNSSMTVVGSAHGRQPKPGADGAWFVEKLINAPFQANIGGITQATVFTTACA  
 LMLAQETRSRDVLFGRVVSGRQCLPVGCGQHIVGPCTNNVPVRSIDGAATPRELLOEVQDQYINSLPFETLGFDEVR  
 ENCTDWPDTTINYGCCTVYQNFNIHPESHIQDQIRILETLARDSRAGKSSECDTALSKGTLDETPIHVDVIAQVPEP  
 DGLRLRVSIVANRRICEEETVDHMIKELCERILSLNSALQDLSTREMEGI\*

>Orf4\_nt

ATGGCTCCTCCCATCTTAAGGTCGACAGGGGAGACTGATGCTACGATTTGCCAGTTATCGAACCGTAGGTGAGAGACT  
 TACACTTATGCAAAAACGCCAGCGTCACACCACTGTGACAAAACATCACATCGTCGTTTTGGACAATTATTTCCCAC  
 ACTATCTTCTCTCGACTTCGACCACACTATTGAATATCACACCTCCACCCGACCTGACCAGCTTCTCTCTCGCATT  
 AAAGACTCCACATTATTATCGTCTCCGACACGAAATTACCCGTGAGAGCCTTCTTGCTGCTAAAAGACTTCAACT  
 CGTGGCCACCAATAGCACCCGGCACCGATACTATTGACAAGGCCACTCTCAGTGAGCTTGGTATCGCACTGTGTAATG  
 TTCTTGCGCAAAGCACTGAATCGGTAACCGAACACGCCTTGCCCTGTATTATGGACTGCGGAGGAACCTTGCTGGAG  
 ATGCACAGGGTGACAGTAGAAGGTAAAGCGTGGACATTGTCTGGAGATACGCAAGCCAGACTGCAGCGTATTGGAAA  
 GCCGTCTCGAACGAATGCCGAGGAGATAATGGTCGTATTTGGGTATGGAGCTTTAGGCAAGAAAATCGAATCCTTAG  
 GTAAAGCTTAGGCATGCAAGTCTCATCGCCGACGCAAGAGGCGTTGGAGACCCGTCGCCGCGGTATGCCTTTC  
 TTACAATGCCTGAAACCAGGTACTCTCTTATTATCACAGCACCTCTCACCGAAACCACCCGTGGTATGATAGGTGC  
 CTCAGAAATCGCTGCTATGGATCCCCTTCCCTCTGATTAATGTTGGCCGCGGCGGATTATCGACGAGCTCGCTC  
 TCGTAAACGCGCTTAGGCAGGGCCTTATCGGCGGCGCTGCGACAGACGTGTATGAAGAGGAACCAGCTACCAAAGTT  
 AACTCACCGTTGCTTGATCCGTCGATCCCGAATTTGTTGCTTTCGCCGCATATAGCATGGTACTCAAAGCGGACGAT  
 GGAAAACACGCTGCGTACCCAGAAGGCTAACCTAGAAGGGTTCGTTTCAGGGAGAATGATCAATATTGTGATTCCTC  
 CCAGCAAGAACAAGAAAGACTAA

>Orf4\_translation

MAPPILRSTGRMLRFASYRTVGERLTLMQKRQRHTTVTKHHIVVLDNYFPHYLPDFDHTIEYHTSTRPDQLPSRI  
 KDSTIIIVSDTQITRESLLAAKRLQLVATNSTGTDIDKATLSELGIALCNVPAQSTESVTEHALALYYGLRRNLE  
 MHRVTVEGKAWTLGSDTQARLQIRIGKPSRTNAEEIMVVFYGGALGKKIESLGLKALGMQVLIARKEALETRPGRMPF  
 LQCLTGPGLFIITAPLETETTRGMIGASEIAAMDPTSLLINVGRGGIIDELALVNLRQGLIIGAATDVYEEEPATKV  
 NSPLLDPSIPNLLSPHIAWYSKRTMENTLRTQKANLEGFVSGRMINIVIPPSKNKKD\*

>Orf5\_nt

ATGGGGTTCAAGGAGATCGAGGTTGGGTTTCCAGGTGCATCAGACACTGACTTCCAGTTCACGCGCAAATGCGCAAC  
 CGACGCTCCATCTGACGTGTGGCTCGAGGTCATGACGCCGTGTGTAAGGACTTCATCCACCGCACGGTTGAGAGCG  
 TGGCCGGGGCTAGCAAGGTTATCATCAGTTTTGTACATTGCGACTAGCGATAACTTCATCGATACCGTCTTCAACACT  
 ACACGAGAGAACCAGCTCCGCACCGCGGTCGAGCACGCTGCCTACTTGAAATCCATCACGAAGGACGACCCGGCACA  
 CAAGGAAACGACATGGACCCTCATGTGGAGCCCCGAGACTTTCTCTGACACTGACCCTGACTTTGCTGTTGAGATCT  
 GCCGTGCGGTCAAAGAGATATGGCAGCCAAATCCTTCGGTTCATCATCTCAATCTCCCGAATACTGTGAAATC  
 TCGATGCCAAACATATACGCTGACCAGGTCGAATTATTCTGCCGTAGCTTTGCCGACGACGATACGGTCTGCGTCTC  
 AATTCACGCACACAATGATCGCGGCTGTGCAGTAGCAGCGAGCGAACTAGCACAGCTTGCTGGAGCATCGAGGGTTG  
 AGGGTTGTCTTTTTGGCAACGGAGAGCGCACGGTAATGTAGACCTCGTAACACTGGCGTTGAACATGTACACACAA  
 GGCATCGACCCTGGTCTTGACCTCTCGGACCTTCCCGGATTTCGCAAGACAGTCGAGGAGTTGACACAGATTCCAGT  
 CCACACTCGTGCGCCATATGCTGGGGACTCTGTCTTCCGCGCATAACAGCGGGCGGTCATCAGGACGCAATTAGCAAGG  
 GCTTCAAGAAATGGAAAGCAGATCCTCGTCTGTGGAAAGTCCCCTATCTGCCCATGGACCCGCGGATATCGGCAGC  
 TCCTACGAAGCAGTCATTTCGCGTAAACTCGCAGAGTGGGAGGGGTGGTATTGCTTGGGTGCTTGAGCGCGGTCTAAA  
 TCTTGAAGTTCCCAAAGATCTACTGCAGGAGTTTTCCCTGACTGTAAAATCCGAGTCCGAGGCCAAACACCGGGAAC  
 TCGAAGTTGACGAGATTATTGAACTGTTCCAGGGCAAGCACTGCGCGGATTAG

>Orf5\_translation

MGFKEIEVGFPGASDTDFQFTRKCATDAPSDVWLEVMTPCRKDFIHRTVESVAGASKVIIISLYIATSDNFIDTVFNT  
 TRENQLRTAVEHAAYLKSITKDDPAHKETTWTLMWSPETFSDTDPDFAVEICRAVKEIWQPNPSVPIILNLPNTVEI  
 SMPNIYADQVELFCRSFADDDTVCVSIHAHNDRGCVAASELAQLAGASRVEGCLFNGERTGNVDLVTLALNMYTQ  
 GIDPGLDLSDLPGIRKTVEELTQIPVHTRAPYAGDSVFRAYSGGHQDAISKGFKKWKADPRLWKVPYLPMDPRDIGS  
 SYEAVIRVNSQSGRGGIAWVLERGLNLEVPKDLLQEFSLTVKSESEAKHRELEVDEIIELFQGHKCAD\*



## Structural characterization of compound 1.

High-resolution mass spectrometry (Bruker qTOF maxis 3G):

Found: 592.91764 (M+H<sup>2+</sup>); calc. for C<sub>63</sub>H<sub>109</sub>N<sub>9</sub>O<sub>12</sub>+H: 592.9171.

**Table S2. <sup>1</sup>H and <sup>13</sup>C assignments for compound 1**

| Aminoacid                                | NH,<br>(N-CH <sub>3</sub> ),<br>[ <sup>13</sup> C], ppm | α-H,<br>[ <sup>13</sup> C]<br>ppm | β-H,<br>[ <sup>13</sup> C]<br>ppm | γ-H,<br>[ <sup>13</sup> C]<br>ppm          | δ-H,<br>[ <sup>13</sup> C]<br>ppm | ε-H,<br>[ <sup>13</sup> C]<br>ppm   | C=O<br>[ <sup>13</sup> C]<br>ppm |
|------------------------------------------|---------------------------------------------------------|-----------------------------------|-----------------------------------|--------------------------------------------|-----------------------------------|-------------------------------------|----------------------------------|
| 2-Hydroxy-5-methyl hexanoic acid [1]     |                                                         | 5.26,<br>[71.8]                   | 1.74,<br>1.68<br>[28.8]           | 1.34,<br>1.28<br>[33.6]                    | 1.55<br>[27.9]*                   | 0.8-0.9<br>[23.1,<br>23.0]**        | [169.9]                          |
| Pipecolic acid [2]                       |                                                         | 5.01<br>[52.2]                    | 2.26,<br>1.33<br>[24.8]           | 1.61,<br>1.34<br>[20.8]                    | 1.70,<br>1.34<br>[25.5]           | 4.07,<br>2.98<br>[43.5]             | [169.6]                          |
| 2-Amino-5-methyl hexanoic acid [3]       | 6.68                                                    | 4.50<br>[51.4]                    | 1.66,<br>1.50<br>[26.2]           | 1.34<br>[35.6]                             | 1.55<br>[27.7]*                   | 0.8-0.9<br>[22.9,<br>22.8]**        | [170.9]                          |
| 5-Methyl-2(methylamino)hexanoic acid [4] | (2.77)<br>[29.4]                                        | 5.19<br>[53.4]                    | 1.73,<br>1.45<br>[26.2]           | 1.00,<br>0.96<br>[34.4]                    | 1.55<br>[27.6]*                   | 0.8-0.9<br>[22.9,<br>22.6]**        | [169.7]                          |
| N-Methyl Threonine [5]                   | (2.79)<br>[29.8]                                        | 5.20<br>[57.6]                    | 3.86<br>[64.3]                    | 1.05<br>[20.6]<br>OH:4.55                  |                                   |                                     | [170.1]                          |
| Pipecolic acid [6]                       |                                                         | 4.70<br>[52.4]                    | 1.77,<br>1.68<br>[25.1]           | 1.61,<br>1.50<br>[18.0]                    | 1.74,<br>1.61<br>[22.9]           | 3.97,<br>3.61<br>[41.9]             | [172.4]                          |
| 5-Methyl-2(methylamino)hexanoic acid [7] | (2.55)<br>[28.1]                                        | 4.63<br>[59.9]                    | 1.94,<br>1.55<br>[25.9]           | 1.15,<br>0.96<br>[34.9]                    | 1.55<br>[27.6]*                   | 0.8-0.9<br>[22.6,<br>22.3]**        | [169.3]                          |
| Alanine [8]                              | 8.78                                                    | 4.91<br>[45.2]                    | 1.19<br>[18.3]                    |                                            |                                   |                                     | [171.8]                          |
| Pipecolic acid [9]                       |                                                         | 5.36<br>[49.4]                    | 1.89,<br>1.38<br>[26.1]           | 2.17,<br>1.57<br>[20.2]                    | 1.45<br>[26.4]                    | 3.81,<br>1.91<br>[43.5]             | [171.1]                          |
| N-Methyl-Isoleucine [10]                 | (2.63)<br>[29.2]                                        | 4.96<br>[58.3]                    | 1.81<br>[33.5]                    | CH <sub>2</sub><br>1.19,<br>0.93<br>[23.6] | 0.79<br>[10.4]                    | γ-CH <sub>3</sub><br>0.83<br>[15.2] | [171.7]                          |

NMR spectra were recorded in d<sub>6</sub>-DMSO on a Bruker AV-III-600 NMR spectrometer (Fällanden, Switzerland) using a 1.7 mm TXI Cryoprobe. All assignments are based on chemical shifts and homo- and hetero nuclear correlations.

\* 5-Methyl-(2-x)-hexanoicacid , position δ-CH, shifts interchangeable

\*\*5-Methyl-(2-x)-hexanoicacid , position ε-CH<sub>3</sub>, shifts interchangeable
